1 **HIV-1 envelope glycoproteins proteolytic cleavage protects infected cells from**  
2 **ADCC mediated by plasma from infected individuals**

3

4 Jérémie Prévost<sup>1,2</sup>, Halima Medjahed<sup>1</sup>, Dani Vézina<sup>1</sup>, Hung-Ching Chen<sup>3</sup>, Beatrice H Hahn<sup>4</sup>,  
5 Amos B. Smith III<sup>3</sup>, Andrés Finzi<sup>1,2,\*</sup>

6

7 <sup>1</sup>Centre de Recherche du CHUM, Montreal, QC H2X 0A9, Canada

8 <sup>2</sup>Département de Microbiologie, Infectiologie et Immunologie, Université de Montréal, Montreal,  
9 QC H2X 0A9, Canada

10 <sup>3</sup>Department of Chemistry, School of Arts and Sciences, University of Pennsylvania,  
11 Philadelphia, PA 19104, USA

12 <sup>4</sup>Departments of Medicine and Microbiology, Perelman School of Medicine, University of  
13 Pennsylvania, Philadelphia, PA 19104-6076, USA

14 \*Correspondence: [andres.finzi@umontreal.ca](mailto:andres.finzi@umontreal.ca)

15

16 **Key Words:** HIV-1, Env glycoprotein, furin cleavage site, CD4 mimetics, Temsavir, nnAbs,  
17 ADCC, HIV+ plasma

18

19 **ABSTRACT**

20 The HIV-1 envelope glycoprotein (Env) is synthesized in the endoplasmic reticulum as a trimeric  
21 gp160 precursor, which requires proteolytic cleavage by a cellular furin protease to mediate  
22 virus-cell fusion. Env is conformationally flexible, but controls its transition from the unbound  
23 “closed” conformation (State 1) to downstream CD4-bound conformations (States 2/3), which  
24 are required for fusion. In particular, HIV-1 has evolved several mechanisms that reduce the  
25 premature “opening” of Env which exposes highly conserved epitopes recognized by non-  
26 neutralizing antibodies (nnAbs) capable of mediating antibody-dependent cellular cytotoxicity  
27 (ADCC). Env cleavage decreases its conformational transitions favoring the adoption of the  
28 “closed” conformation. Here we altered the gp160 furin cleavage site to impair Env cleavage  
29 and to examine its impact on ADCC responses mediated by plasma from HIV-1-infected  
30 individuals. We found that infected primary CD4+ T cells expressing uncleaved, but not  
31 wildtype, Env are efficiently recognized by nnAbs and become highly susceptible to ADCC  
32 responses mediated by plasma from HIV-1-infected individuals. Thus, HIV-1 limits the exposure  
33 of uncleaved Env at the surface of HIV-1-infected cells at least in part to escape ADCC  
34 responses.

35

## 36 1. Introduction

37 The human immunodeficiency virus type 1 (HIV-1) envelope glycoprotein (Env) is a  
38 class I viral membrane fusion protein which mediates viral entry using the CD4 cellular receptor.  
39 The envelope gp160 precursor is synthesized in the endoplasmic reticulum (ER) and  
40 oligomerizes as a trimer [1, 2]. Subsequently, the trimeric Env traffics through the trans-Golgi  
41 network (TGN) to reach the plasma membrane and to be incorporated into nascent HIV-1  
42 virions [3-5]. During its transit through the secretory pathway, Env undergoes important post-  
43 translational modifications, including N-linked and O-linked glycosylation as well as proteolytic  
44 cleavage [6-10]. The addition of high-mannose oligosaccharides takes place in the ER and  
45 these glycans are further processed to acquire complex modifications in the TGN [11].  
46 Concomitantly, proprotein convertases present in the TGN, including furin and furin-like  
47 proteases, catalyze the cleavage of the immature gp160 polyprotein [12-15] into two functional  
48 non-covalently linked subunits: the exterior gp120 subunit, which is responsible for viral  
49 attachment and the transmembrane gp41 subunit, which mediates membrane fusion. The  
50 human furin protein is part of the subtilisin-like serine endoprotease family and recognizes  
51 polybasic motifs, having Arg-X-Lys/Arg-Arg (RXK/RR) as a consensus cleavage site [16]. HIV-1  
52 Env possess a highly conserved furin cleavage site at the gp120-gp41 junction (<sup>508</sup>REKR<sup>511</sup>)  
53 which is adjacent to the hydrophobic fusion peptide at the gp41 N-terminus, with furin cleavage  
54 being essential for viral infectivity [6, 8, 17, 18]. A putative secondary furin cleavage site  
55 (<sup>500</sup>KAKR<sup>503</sup>), located a few residues upstream of the primary cleavage site, has been described  
56 but its function remains unclear [17, 19].

57  
58 The functional mature Env trimer is known to sample different conformations ranging  
59 from the pre-fusion “closed” metastable conformation (State 1) to the CD4-bound “open”  
60 conformation (State 3), transitioning through an intermediate asymmetric conformation (State 2)  
61 [20, 21]. Env glycoproteins from primary isolates preferentially adopt the State 1 conformation,

62 which is preferentially recognized by broadly-neutralizing antibodies (bNAbs) [20, 22-24], and  
63 can be triggered into downstream conformations by CD4 binding, which exposes highly  
64 conserved epitopes targeted by non-neutralizing antibodies (nnAbs) [20, 25, 26]. These nnAbs  
65 are rapidly elicited upon infection and vaccination [27-32] and mediate potent Fc-effector  
66 functions, including antibody-dependent cellular cytotoxicity (ADCC) [26, 33-38]. The binding of  
67 Env to CD4 on the surface of HIV-1-infected cells stabilizes Env in State 2A, which is highly  
68 susceptible to nnAbs-mediated ADCC [26, 39, 40]. However, HIV-1 has evolved to prevent the  
69 premature adoption of the CD4-bound conformation by downregulating and degrading pre-  
70 existing and newly-synthesized CD4 through its accessory proteins Nef and Vpu [26, 35, 41,  
71 42]. Small CD4 mimetic compounds (CD4mc) are being developed to “open up” Env, with the  
72 goal of harnessing the potential of nnAbs responses for prevention [31, 32, 38, 43-46] and  
73 eradication [36, 40, 47-53] strategies. Another class of Env antagonists known as  
74 conformational blockers, which includes the FDA-approved drug Temsavir, prevent Env  
75 transitions to downstream conformations by stabilizing Env State 1 [20, 22, 54, 55].

76  
77 Besides Env-CD4 interaction, there are also structural features of HIV-1 Env that can  
78 modulate the sensitivity of HIV-1 to ADCC responses mediated by nnAbs present in plasma  
79 from infected individuals. Natural polymorphisms in the Phe43 cavity (notably in CRF01\_AE  
80 strains) and mutations of conserved residues in the trimer association domain have been shown  
81 to modulate Env conformation [25, 56-59] and as a result, the susceptibility of cells infected with  
82 these viruses to ADCC responses [51, 60, 61]. Similarly, proteolytic cleavage has been reported  
83 to stabilize a “closed” Env conformation [62-65], since mutations in the furin cleavage site  
84 resulted in the spontaneous sampling of downstream conformations, including Env State 2A [40,  
85 55, 63]. Here we evaluate the impact of altering Env furin cleavage site on the susceptibility of  
86 infected primary CD4+ T cells to ADCC responses mediated by HIV+ plasma.

87

## 88 **2. Materials and methods**

### 89 *2.1 Ethics Statement*

90 Written informed consent was obtained from all study participants [the Montreal Primary  
91 HIV Infection Cohort [66, 67] and the Canadian Cohort of HIV Infected Slow Progressors [68-  
92 70], and research adhered to the ethical guidelines of CRCHUM and was reviewed and  
93 approved by the CRCHUM institutional review board (ethics committee, approval number CE  
94 16.164 - CA). Research adhered to the standards indicated by the Declaration of Helsinki. All  
95 participants were adult and provided informed written consent prior to enrolment in accordance  
96 with Institutional Review Board approval.

97

### 98 *2.2 Cell lines and primary cells*

99 293T human embryonic kidney cells (obtained from ATCC) and TZM-bl cells (NIH AIDS  
100 Reagent Program) were maintained at 37°C under 5% CO<sub>2</sub> in Dulbecco's Modified Eagle  
101 Medium (DMEM) (Wisent), supplemented with 5% fetal bovine serum (FBS) (VWR) and 100  
102 U/mL penicillin/streptomycin (Wisent). 293T cells were derived from 293 cells, into which the  
103 simian virus 40 T-antigen was inserted. TZM-bl were derived from HeLa cells and were  
104 engineered to stably express high levels of human CD4 and CCR5 and to contain the firefly  
105 luciferase reporter gene under the control of the HIV-1 promoter [71]. Primary human PBMCs  
106 and CD4<sup>+</sup> T cells were isolated, activated and cultured as previously described [26]. Briefly,  
107 PBMCs were obtained by leukapheresis from six HIV-negative individuals (all males) and CD4<sup>+</sup>  
108 T lymphocytes were purified from resting PBMCs by negative selection using immunomagnetic  
109 beads per the manufacturer's instructions (StemCell Technologies) and were activated with  
110 phytohemagglutinin-L (10 µg/mL) for 48 hours and then maintained in RPMI 1640 complete  
111 medium supplemented with rIL-2 (100 U/mL).

112

### 113 *2.3 Antibodies and sera*

114 The following Abs were used to assess Env conformation at the cell surface:  
115 conformation-independent anti-gp120 outer-domain 2G12 (NIH AIDS Reagent Program),  
116 broadly-neutralizing antibodies VRC03 (NIH AIDS Reagent Program), PG9 (Polymun), PGT126,  
117 PGT151 (IAVI) 10-1074 (kindly provided by Michel Nussenzweig) and VRC34 (kindly provided  
118 by John Mascola) as well as non-neutralizing antibodies F240, 19b, 17b, A32, C11 (NIH AIDS  
119 Reagent Program). The HIV-IG polyclonal antibody consists of anti-HIV immunoglobulins  
120 purified from a pool of plasma from HIV+ asymptomatic donors (NIH AIDS Reagent Program).  
121 Goat anti-human and anti-mouse antibodies pre-coupled to Alexa Fluor 647 (Invitrogen) were  
122 used as secondary antibodies in flow cytometry experiments. Plasma from HIV-infected  
123 individuals were collected, heat-inactivated and conserved at  $-80^{\circ}\text{C}$  until use.

124

#### 125 *2.4 Small molecules*

126 The small-molecule CD4-mimetic compound BNM-III-170 was synthesized as described  
127 previously [72]. The HIV-1 attachment inhibitor Temsavir (BMS-626529) was purchased from  
128 APExBIO. The compounds were dissolved in dimethyl sulfoxide (DMSO) at a stock  
129 concentration of 10 mM and diluted to 50  $\mu\text{M}$  in phosphate-buffered saline (PBS) for cell-surface  
130 staining and virus capture assay or in RPMI 1640 complete medium for ADCC assays.

131

#### 132 *2.5 Plasmids and proviral constructs*

133 The vesicular stomatitis virus G (VSV-G)-encoding plasmid was previously described  
134 [73]. Transmitted/Founder (T/F) infectious molecular clones (IMCs) of patients CH058 and  
135 CH077 were previously reported [74-77]. To generate IMCs encoding for cleavage-deficient  
136 Env, two mutations (R508S/R511S) were introduced in the furin cleavage site (<sup>508</sup>REKR<sup>511</sup>)  
137 using the QuikChange II XL site-directed mutagenesis protocol (Stratagene). The presence of  
138 the desired mutations was determined by automated DNA sequencing.

139

## 140 *2.6 Radioactive labeling and immunoprecipitation of envelope glycoproteins*

141  $3 \times 10^5$  293T cells were transfected by the calcium phosphate method with the different  
142 IMCs. One day after transfection, cells were metabolically labeled for 16h with 100  $\mu$ Ci/mL  
143 [<sup>35</sup>S]methionine-cysteine ([<sup>35</sup>S] Protein Labeling Mix; Perkin-Elmer) in Dulbecco's modified  
144 Eagle's medium lacking methionine and cysteine and supplemented with 5% dialyzed fetal  
145 bovine serum. Cells were subsequently lysed in RIPA buffer (140 mM NaCl, 8 mM Na<sub>2</sub>HPO<sub>4</sub>, 2  
146 mM NaH<sub>2</sub>PO<sub>4</sub>, 1% NP40, 0.05% sodium dodecyl sulfate (SDS), 1.2 mM sodium deoxycholate).  
147 Precipitation of radiolabeled envelope glycoproteins from cell lysates or medium was performed  
148 with a mixture of sera from HIV-1-infected individuals in the presence of 50  $\mu$ l of 10% Protein A-  
149 Sepharose (Cytiva) at 4 °C. The precipitated proteins were loaded onto SDS-PAGE gels and  
150 analyzed by autoradiography and densitometry to calculate their processing indexes. The  
151 processing index is a measure of the conversion of the mutant gp160 Env precursor to mature  
152 gp120, relative to that of the wild-type Env trimers. The processing index is calculated with the  
153 following formula: processing index = ([total gp120]mutant  $\times$  [gp160]WT)/([gp160]mutant  $\times$  [total  
154 gp120]WT).

155

## 156 *2.7 Viral production and infections*

157 To achieve similar levels of infection in primary CD4<sup>+</sup> T cells among the different IMCs  
158 tested, VSV-G-pseudotyped HIV-1 viruses were produced and titrated as previously described  
159 [60]. Viruses were then used to infect activated primary CD4<sup>+</sup> T cells from healthy HIV-1  
160 negative donors by spin infection at 800  $\times$  g for 1 h in 96-well plates at 25 °C. To assess viral  
161 infectivity, TZM-bl reporter cells were seeded at a density of  $2 \times 10^4$  cells/well in 96-well  
162 luminometer-compatible tissue culture plates (PerkinElmer) 24 h before infection. Normalized  
163 amounts of viruses (according to reverse transcriptase activity [78]) in a final volume of 100  $\mu$ l  
164 were then added to the target cells and incubated for 48 h at 37°C. The medium was then  
165 removed from each well, and the cells were lysed by the addition of 30  $\mu$ l of passive lysis buffer

166 (Promega) and one freeze-thaw cycle. An LB 941 TriStar luminometer (Berthold Technologies)  
167 was used to measure the luciferase activity of each well after the addition of 100  $\mu$ l of luciferin  
168 buffer (15 mM MgSO<sub>4</sub>, 15 mM KH<sub>2</sub>PO<sub>4</sub> [pH 7.8], 1 mM ATP, and 1 mM 170 dithiothreitol) and  
169 50  $\mu$ l of 1 mM d-luciferin potassium salt (Prolume).

170

## 171 *2.8 Virus capture assay*

172 The HIV-1 virus capture assay was previously reported [79]. Pseudoviral particles were  
173 produced by transfecting  $2 \times 10^6$  293T cells with pNL4.3 R-E- Luc (NIH AIDS Reagent Program)  
174 (3.5  $\mu$ g), HIV-1<sub>CH058</sub> (3.5  $\mu$ g), and VSV-G (1  $\mu$ g) using standard calcium phosphate method.  
175 Forty-eight hours later, virus-containing supernatant were collected, and cell debris were  
176 removed by centrifugation (1,500 rpm for 10 min). Anti-Env antibodies were immobilized on  
177 white MaxiSorp ELISA plates (Thermo Fisher Scientific) at a concentration of 5  $\mu$ g/ml in 100  $\mu$ L  
178 of PBS overnight at 4°C. Unbound antibodies were removed by washing twice the plates twice  
179 with PBS. Plates were subsequently blocked with 3% bovine serum albumin (BSA) in PBS for 1  
180 h at room temperature. After washing plates twice with PBS, 200  $\mu$ l of virus-containing  
181 supernatants were added to the wells. After 4 to 6 h incubation, virions were removed, and the  
182 wells were washed 3 times with PBS. Virus capture by any given antibody was visualized by  
183 adding  $1 \times 10^4$  293T cells per well in complete DMEM. To measure recombinant virus infectivity,  
184  $1 \times 10^4$  293T cells were directly mixed with 100  $\mu$ l of virus-containing supernatants per well.  
185 Forty-eight hours post-infection, cells were lysed by the addition of 30  $\mu$ l of passive lysis buffer  
186 (Promega) and one freeze-thaw cycle. An LB 941 TriStar luminometer (Berthold Technologies)  
187 was used to measure the luciferase activity of each well after the addition of 100  $\mu$ l of luciferin  
188 buffer (15 mM MgSO<sub>4</sub>, 15 mM KH<sub>2</sub>PO<sub>4</sub> [pH 7.8], 1 mM ATP, and 1 mM dithiothreitol) and 50  $\mu$ l of  
189 1 mM d-luciferin potassium salt (Prolume).

190



191 *2.9 Flow cytometry analysis of cell-surface and intracellular staining*

192 Cell-surface staining of HIV-1-transfected and HIV-1-infected cells was executed as  
193 previously described [35, 61]. For transfected cells, we used the standard calcium phosphate  
194 method to transfect 7 µg of each IMC into  $2 \times 10^6$  293T cells. Binding of cell-surface HIV-1 Env  
195 by anti-Env mAbs (5 µg/mL) or HIV+ plasma (1:1000 dilution) was performed at 48h post-  
196 transfection. Similarly, cell-surface staining of infected cells was performed at 48h post-infection.  
197 After cell-surface staining, transfected cells and infected cells were permeabilized using the  
198 Cytotfix/Cytoperm Fixation/ Permeabilization Kit (BD Biosciences) and stained intracellularly  
199 using PE-conjugated mouse anti-p24 mAb (clone KC57; Beckman Coulter; 1:100 dilution). The  
200 percentage of transfected or infected cells (p24<sup>+</sup>) was determined by gating on the living cell  
201 population on the basis of a viability dye staining (Aqua Vivid, Thermo Fisher Scientific).  
202 Samples were acquired on an LSRII cytometer (BD Biosciences), and data analysis was  
203 performed using FlowJo v10.5.3 (Tree Star).

204

205 *2.10 FACS-based ADCC assay*

206 Measurement of ADCC using the FACS-based assay was performed at 48h post-  
207 infection as previously described. Briefly, HIV-1-infected primary CD4<sup>+</sup> T cells were stained with  
208 AquaVivid viability dye and cell proliferation dye (eFluor670; eBioscience) and used as target  
209 cells. Autologous PBMC effectors cells, stained with another cellular marker (cell proliferation  
210 dye eFluor450; eBioscience), were added at an effector: target ratio of 10:1 in 96-well V-bottom  
211 plates (Corning). A 1:1000 final dilution of HIV+ plasma was added to appropriate wells and  
212 cells were incubated for 5 min at room temperature. The plates were subsequently centrifuged  
213 for 1 min at 300 x g, and incubated at 37°C, 5% CO<sub>2</sub> for 5h before being fixed in a 2% PBS-  
214 formaldehyde solution. Samples were acquired on an LSRII cytometer (BD Biosciences) and  
215 data analysis was performed using FlowJo v10.5.3 (Tree Star). The percentage of ADCC was

216 calculated with the following formula: (% of p24+ cells in Targets plus Effectors) – (% of p24+  
217 cells in Targets plus Effectors plus sera) / (% of p24+ cells in Targets) by gating on infected  
218 lived target cells.

219

## 220 *2.11 Statistical analysis*

221 Statistics were analyzed using GraphPad Prism version 9.1.0 (GraphPad). Every data  
222 set was tested for statistical normality and this information was used to apply the appropriate  
223 (parametric or nonparametric) statistical test. P values <0.05 were considered significant;  
224 significance values are indicated as \* P<0.05, \*\* P<0.01, \*\*\* P<0.001, \*\*\*\* P<0.0001.

225

## 226 **3. Results**

### 227 *3.1 Conformation of HIV-1 uncleaved Env at the surface of infected cells and viral particles.*

228 To study the role of the furin cleavage site on Env conformation, we performed  
229 mutagenesis on the infectious molecular clones (IMCs) of clade B transmitted/founder (T/F)  
230 viruses CH058 and CH077. Envs from both viruses were previously shown to preferentially  
231 sample the “closed” State 1 conformation [61]. We introduced substitutions in the primary  
232 cleavage site at position 508 and 511 (Figure 1A), to replace the highly conserved arginine  
233 residues with serine residues (R508S/R511S; referred as CI- mutant), a double mutant known to  
234 efficiently abrogate furin-dependant Env processing [64, 80-82]. We used protein radioactive  
235 labelling of 293T cells transfected with the different IMC constructs followed by Env  
236 immunoprecipitation to confirm the effect of the mutations on Env cleavage (Figure 1B-E). As  
237 expected, Env glycoproteins expressed from the wild-type (WT) construct were efficiently  
238 cleaved while their cleavage-deficient (CI-) counterpart yielded little to no detectable gp120 in  
239 the 293T cell lysates (Figure 1B,D). Although we observed some soluble gp120 in the  
240 supernatant of CH058-transfected cells, this was likely due to the presence of second upstream  
241 cleavage site, which matched the furin consensus sequence (RAKR). Supernatant of CH077-

242 transfected cells did not contain gp120 consistent with an altered upstream cleavage site  
243 (KAKR) (Figure 1A). Of note, two bands of gp160 with distinct molecular weights were observed  
244 in cells transfected with CI- variants, a phenotype previously observed that was linked to a  
245 difference in glycosylation [83-85].

246

247         Subsequently, we evaluated the ability of a panel of bNAbs and nnAbs to recognize the  
248 cleaved (WT) and uncleaved (CI-) Env at the surface of 293T cells. We selected these cells  
249 since they don't express CD4 and it has been well documented that the presence of CD4 affects  
250 Env conformation [26, 35, 86]. Cells were transfected with the different IMC constructs and virus-  
251 expressing cells were identified using Gag p24 staining (Figure 1F-G). Cell-surface Env  
252 expression was normalized using the conformation-independent 2G12 antibody. Cells  
253 expressing WT Env were preferentially recognized by the bNAbs preferring the State 1  
254 conformation (PGT126, VRC03, PG9) and recognizing the fusion peptide (PGT151, VRC34)  
255 compared to those expressing the respective cleavage site mutants (Figure 1F-G). Conversely,  
256 the binding of nnAbs targeting the downstream conformations States 2/3 (19b, F240, 17b) and  
257 State 2A (A32, C11) was significantly enhanced on cells expressing uncleaved Env (Figure 1F-  
258 G). To confirm this phenotype in a physiologically more relevant culture system, we infected  
259 activated primary CD4+ T cells with the different primary IMCs. Of note, all viruses were  
260 pseudotyped with the VSV G glycoprotein to normalize the level of infection and to compensate  
261 the inability of uncleaved Env to mediate viral fusion. Consistent with the 293T results,  
262 productively-infected cells (p24+ CD4<sub>low</sub>) were more efficiently recognized by bNAbs when  
263 expressing cleaved Env, and by nnAbs when expressing uncleaved Env (Figure 1H-I). Overall,  
264 these results support and extend previous observations indicating that furin cleavage favors the  
265 adoption of the native "closed" conformation at the cell surface [40, 65, 84].

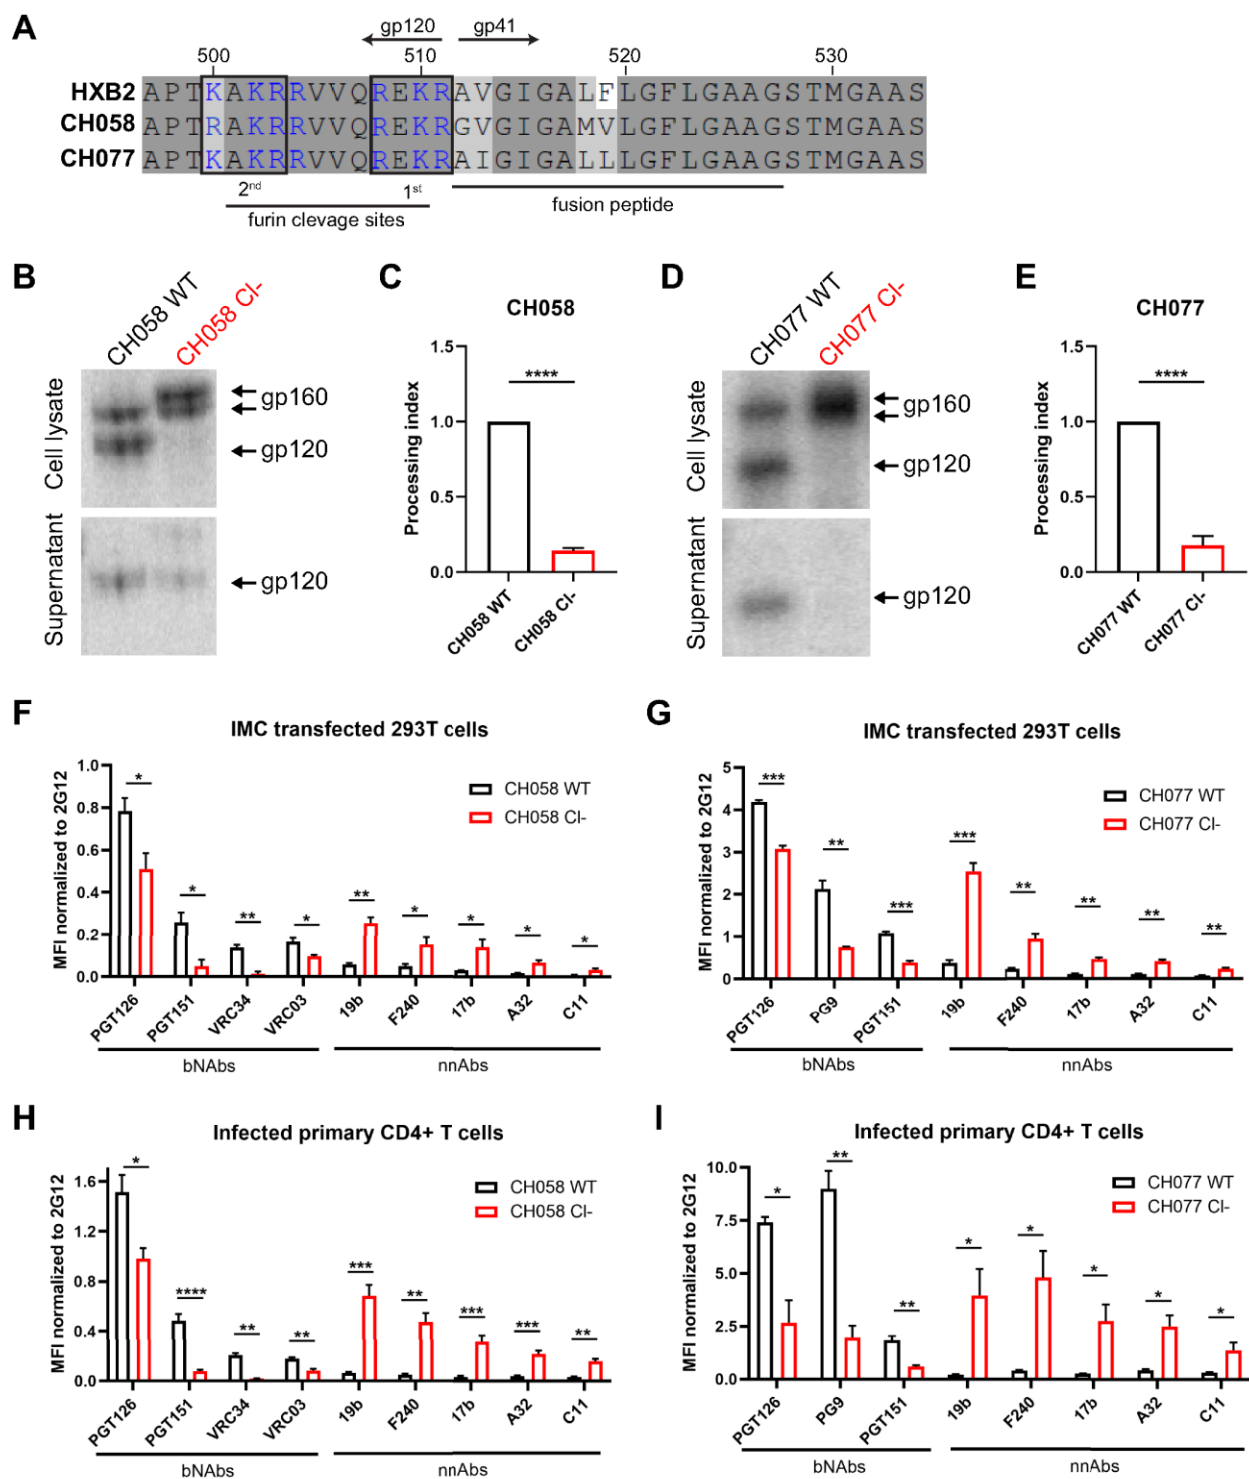

266  
 267

268 **Figure 1. Proteolytic cleavage stabilizes Env in its “closed” conformation.**  
269 (A) Sequence alignment of the HIV-1 Env furin cleavage site region from primary viruses CH058  
270 (GenBank accession number JN944940) and CH077 (GenBank accession number JN944941)  
271 with the HXB2 reference strain (GenBank accession number K03455). Putative furin cleavage  
272 sequences are highlighted by black boxes. Positively-charged residues (arginine and lysine) are  
273 shown in blue. Residue numbering is based on the HXB2 strain. Identical residues are shaded  
274 in dark gray, and conserved residues are shaded in light gray. (B-E) 293T cells were transfected  
275 with primary IMCs (B-C) CH058, (D-E) CH077 WT or their cleavage-deficient (CI-) variants and  
276 metabolically-labeled with [<sup>35</sup>S]-methionine and [<sup>35</sup>S]-cysteine. (B,D) Cell lysates and  
277 supernatants were immunoprecipitated with plasma from HIV-1-infected individuals. The  
278 precipitated proteins were loaded onto SDS-PAGE gels and analyzed by autoradiography and  
279 densitometry to calculate their processing indexes. The processing index is a measure of the  
280 conversion of the mutant gp160 Env precursor to mature gp120, relative to that of the wild-type  
281 Env trimer. (C,E) Shown is the average of processing indexes calculated in 3 independent  
282 experiments. (F-I) Cell-surface staining of (F-G) IMC transfected 293T cells (H-I) or primary  
283 CD4+ T cells infected with IMCs (F,H) CH058 and (G,I) CH077 WT or their cleavage-deficient  
284 (CI-) variants using a panel of anti-Env bNAbs (PGT126, PG9, PGT151, VRC34, VRC03) and  
285 nnAbs (19b, F240, 17b, A32, C11). Shown are the mean fluorescence intensities (MFI) using  
286 the different antibodies normalized to the signal obtained with the conformation-independent  
287 2G12 mAb. MFI values were measured on the transfected or infected (p24+) population for  
288 staining obtained in at least 3 independent experiments. Error bars indicate mean ± SEM.  
289 Statistical significance was tested using an unpaired t-test (\* p < 0.05, \*\* p < 0.01, \*\*\* p < 0.001,  
290 \*\*\*\* p < 0.0001).  
291

292 We next investigated the effect of furin cleavage on Env conformation at the surface of  
293 viral particles, since the viral membrane is known to be enriched in cholesterol, a lipid known to  
294 stabilize Env State 1 conformation by interacting with gp41 membrane proximal external region  
295 (MPER) [87-89]. Since virions expressing the Env CI-variants were unable to infect even highly  
296 permissive cells, we used a recently developed virus capture assay [79] (Figure 2A).  
297 Specifically, we generated luciferase reporter pseudovirions that contained both HIV-1 Env and  
298 VSV G glycoproteins, thus allowing captured virions to infect 293T cells in an Env-independent  
299 manner (i.e., 293T infection is driven by the incorporated VSV G glycoprotein, Figure 2B).  
300 Virions harboring WT Env were captured more efficiently by bNAbs, while virions harboring  
301 uncleaved Env were primarily bound by nnAbs (Figure 2C). The recognition of pseudovirions  
302 was also assessed using purified anti-HIV-1 immunoglobulins from HIV+ asymptomatic donors  
303 (HIV-IG) [90]. Since the vast majority of naturally-elicited antibodies targets Env in its “open”  
304 conformation, HIV-IG polyclonal antibodies captured viral particles displaying immature Env in a

305 larger proportion (Figure 2D). HIV-IG specific capture of uncleaved or cleaved Env could be  
306 further increased using the small molecule CD4mc BNM-III-170, which stabilizes the CD4-  
307 bound conformation (Figure 2D). Alternatively, treatment with the conformational blocker  
308 Temsavir decreased the capacity of HIV-IG to capture viral particles bearing CI- Envs (Figure  
309 2D), in agreement with its capacity to stabilize the “closed” conformation [20, 22, 55]. These  
310 results indicate that uncleaved Env can be forced into “open” or “closed” conformations using  
311 small molecule Env antagonists.  
312

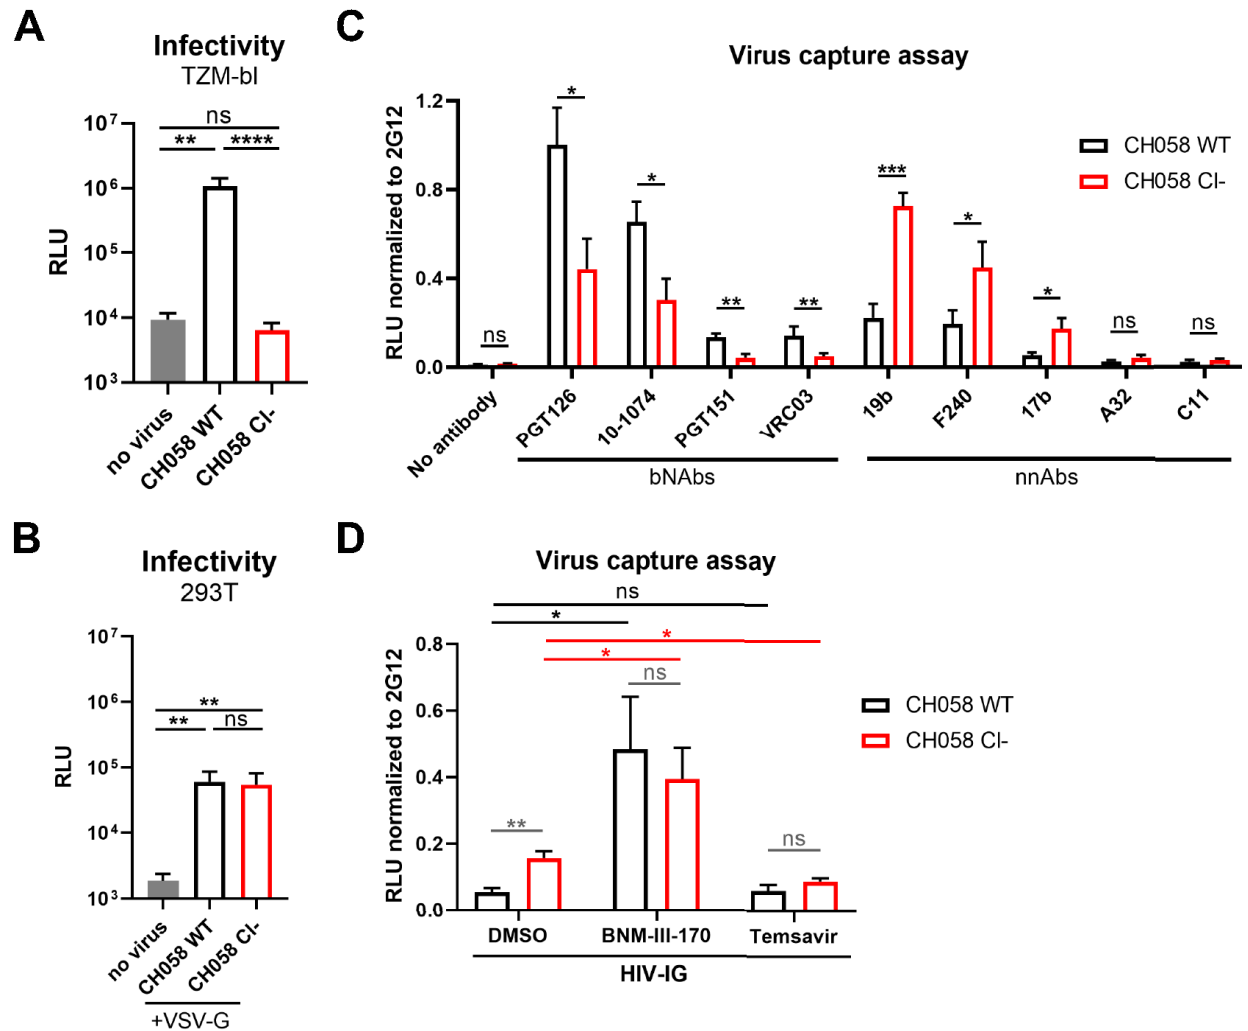

313  
 314 **Figure 2. Virions displaying uncleaved Env are better recognized by nnAbs.**  
 315 (A) Viral infectivity was assessed by incubating TZM-bl target cells with HIV-1 CH058 virions  
 316 expressing the wild-type (WT) or cleavage-deficient (CI-) Env glycoprotein for 48-hours. Viral  
 317 preparations were normalized according to reverse transcriptase activity. (B) VSV-G-  
 318 pseudotyped viral particles encoding the luciferase gene (Luc+) and bearing HIV-1 CH058 Env  
 319 wildtype (WT) or its cleavage-deficient mutant (CI-) were used to infect 293T cells to determine  
 320 their infectivity in a single-round infection. (C-D) These recombinant pseudovirions were further  
 321 tested for virus capture by (C) a panel of anti-Env bNAbs (PGT126, PG9, PGT151, VRC34,  
 322 VRC03) and nnAbs (19b, F240, 17b, A32, C11) or (D) HIV-IG. RLU values obtained using the  
 323 different antibodies were normalized to the signal obtained with the conformation-independent  
 324 2G12 mAb. Data shown are the mean  $\pm$  SEM from at least three independent experiments.  
 325 Statistical significance was tested using an unpaired t test or a Mann-Whitney U test based on  
 326 statistical normality (\*,  $P < 0.05$ ; \*\*,  $P < 0.01$ ; \*\*\*,  $P < 0.001$ ; ns, nonsignificant).  
 327

328 *3.2 Impact of HIV-1 Env proteolytic cleavage on ADCC responses mediated by HIV+ plasma.*

329           Knowing that alterations in the furin cleavage site increase the exposure of downstream  
330 conformations at the surface of infected cells and lentiviral particles, we sought to determine  
331 whether the presence of uncleaved Env at the surface of infected cells could also affect ADCC  
332 responses mediated by plasma from HIV-1-infected donors. Activated primary CD4+ T cells  
333 were infected with WT or cleavage defective CH058 and CH077 and then examined for their  
334 susceptibility to ADCC killing following incubation with plasma from 15 different chronically HIV-  
335 1-infected individuals. As expected, HIV+ plasma binding was significantly higher on infected  
336 cells expressing cleavage-deficient Env compared to WT Env (Figure 3A-B). Moreover,  
337 inhibition of Env cleavage led to strong ADCC responses, while WT-infected cells were  
338 protected from these responses mediated by HIV+ plasma (Figure 3C-D). Treatment with BNM-  
339 III-170 was found to enhance the binding of HIV+ plasma on both WT and Cl- mutant infected  
340 cells, consistent with its ability to expose CD4i epitopes. Accordingly, CD4mc addition induced a  
341 potent ADCC response against WT-infected cells, but did not further enhance the ADCC  
342 response against cells expressing cleavage-deficient Env, suggesting that CD4i epitope  
343 exposure by uncleaved Env is sufficient to trigger the elimination of infected cells by ADCC.  
344 Conversely, the addition of State 1-stabilizing molecule Temsavir protected Cl- expressing cells  
345 from ADCC by decreasing the binding of HIV+ plasma to uncleaved Env (Figure 3A-D). Of note,  
346 Temsavir didn't impact HIV+ plasma mediated ADCC against WT infected cells since they are  
347 known to already express the Env in the "closed" conformation [26, 35-37, 40, 60, 61, 86, 91,  
348 92]. Altogether, our results demonstrate the importance for HIV-1 to limit the presence of Env  
349 gp160 precursor at the surface of infected cells to evade nnAbs-mediated ADCC responses.



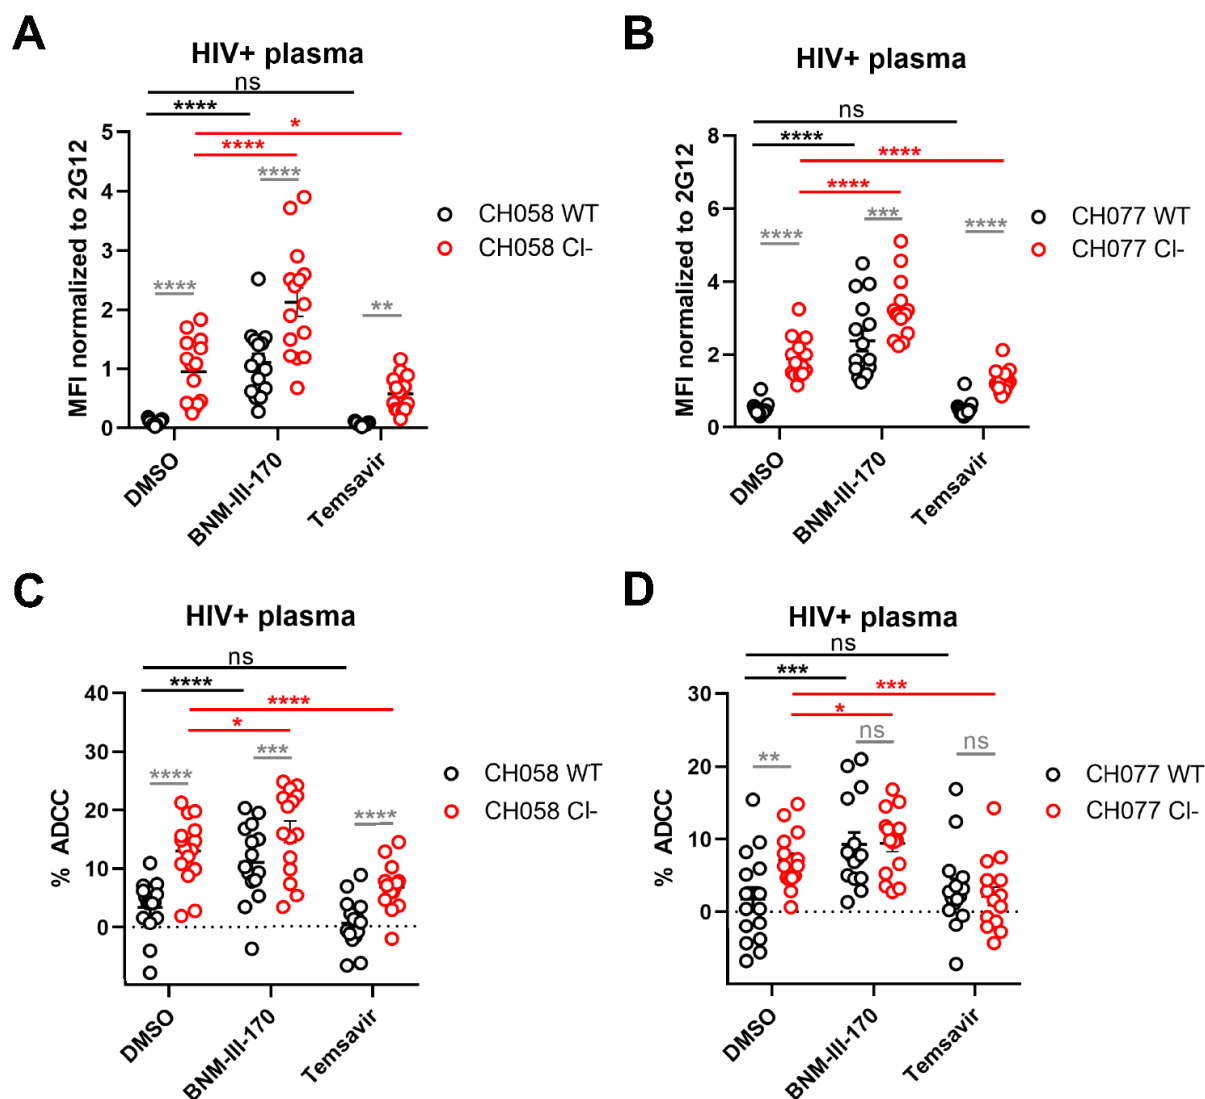

350

351 **Figure 3. Env cleavage protects HIV-1-infected cells from ADCC mediated by HIV+**  
 352 **plasma.**

353 (A-B) Cell surface staining of primary CD4+T cells infected with primary HIV-1 viruses (A)  
 354 CH058 and (B) CH077 WT or their cleavage-deficient (CI-) variants using plasma from 15  
 355 different HIV-1-infected individuals in the presence of 50  $\mu$ M of CD4mc BNM-III-170,  
 356 conformational blocker Temsavir or an equivalent volume of the vehicle (DMSO). The graphs  
 357 show the MFI obtained on the infected (p24+) cell population. (C-D) Primary CD4+ T cells  
 358 infected with (C) CH058 and (D) CH077 viruses were also used as target cells, and autologous  
 359 PBMCs were used as effector cells in a FACS-based ADCC assay. The graphs shown  
 360 represent the percentages of ADCC mediated by 15 different HIV+ plasma in the presence of  
 361 50  $\mu$ M of CD4mc BNM-III-170, attachment inhibitor Temsavir or an equivalent volume of the  
 362 vehicle (DMSO). All results were obtained using cells from at least three different donors. Error  
 363 bars indicate means  $\pm$  SEM. Statistical significance was tested using a repeated measures one-  
 364 way ANOVA with a Holm-Sidak post-test (\*,  $P < 0.05$ ; \*\*,  $P < 0.01$ ; \*\*\*,  $P < 0.001$ ; \*\*\*\*,  
 365  $P < 0.0001$ ; ns, nonsignificant).  
 366

#### 367 **4. Discussion**

368           In this study, we show that uncleaved HIV-1 Env trimers display a conformational  
369 flexibility which favors the sampling of downstream “more open” conformations at the surface of  
370 infected cells and pseudoviral particles. Cell-surface expression of uncleaved gp160 leads to an  
371 efficient recognition of infected cells by non-neutralizing CD4i antibodies naturally-present in  
372 plasma from HIV-1-infected individuals and as a consequence, leads to a significantly higher  
373 susceptibility to ADCC responses. Conversely, efficient cleavage by endogenous furin allows  
374 Env trimers to sample a metastable “closed” conformation (State 1), thus protecting HIV-1-  
375 infected cells from ADCC responses mediated by HIV+ plasma. Beyond the well-established  
376 role of furin cleavage on viral infectivity, efficient proteolytic cleavage of Env trimers thus  
377 appears to allow HIV-1 to evade humoral immune responses. These results are important in the  
378 context of recent findings showing that several interferon-inducible cellular antiviral factors affect  
379 Env gp160 precursor processing [93-97]. Among them, IFITM proteins impair Env cleavage  
380 through a direct interaction with Env, while GBP2 and GBP5 restrict furin protease activity [93,  
381 96]. The antiviral activity of both families of proteins can be overcome by HIV-1 through Env  
382 substitutions or by increasing Env expression through the deletion of the accessory Vpu protein,  
383 respectively [97-100].

384

385           According to the Los Alamos National Laboratory HIV sequence database, very few mutations  
386 are naturally found in the furin cleavage site, especially for the basic residues found at position  
387 508, 510 and 511 which are more than 99.7% conserved. Given the importance of an effective  
388 Env cleavage to generate infectious viral particles, therapeutic interventions designed to  
389 specifically inhibit this proteolytic cleavage could result in a loss in infectivity with a concomitant  
390 increase in ADCC responses against infected cells. A recent study has shown that  
391 conformational blockers, such as Temsavir, can interfere with proper Env cleavage by reducing  
392 its conformational flexibility [63]. Additional drugs inhibiting directly the furin protease activity,

393 including the synthetic peptide Dec-RVKR-CMK and the serine protease inhibitor  $\alpha_1$ -PDX, are  
394 also being investigated, but their *in vivo* efficacy and toxicity remain to be determined [12, 13,  
395 101-105]. If these broad-spectrum inhibitors end up being well tolerated and exhibit good  
396 pharmacokinetic properties, they may also be useful as therapeutics against other viral  
397 infections, including Influenza A, Ebola, Respiratory syncytial virus (RSV) and SARS-CoV-2,  
398 where the acquisition of a furin cleavage site in the respective fusion glycoproteins appears to  
399 confer a higher level of infectivity [106-110].

400

#### 401 **FUNDING**

402 This study was supported by grants from the National Institutes of Health to A.F. (R01  
403 AI148379, R01 AI129769 and R01 AI150322) and BHH (R01 AI162646 and UM1 AI164570).  
404 Support for this work was also provided by P01 GM56550/AI150471 to A.B.S. and A.F., by  
405 NIAID-funded ERASE HIV consortium (UM1 AI-164562), by a CIHR foundation grant #352417,  
406 a CIHR Team Grant #422148 and a Canada Foundation for Innovation grant #41027 to A.F.  
407 A.F. is the recipient of a Canada Research Chair on Retroviral Entry #RCHS0235 950-232424.  
408 J.P. is the recipient of a CIHR doctoral fellowship. The funders had no role in study design, data  
409 collection and analysis, decision to publish, or preparation of the manuscript.

410

#### 411 **ACKNOWLEDGMENTS**

412 The authors thank the CRCHUM BSL3 and Flow Cytometry Platforms for technical assistance,  
413 Mario Legault from the FRQS AIDS and Infectious Diseases network for cohort coordination and  
414 clinical samples. We thank Michel Nussenzweig (The Rockefeller University) for 10-1074 and  
415 John Mascola (VRC, NIAID) for VRC34. The graphical abstract was prepared using illustrations  
416 from BioRender.com.

417

418 **AUTHOR CONTRIBUTIONS**

419 J.P. and A.F. conceived the study. J.P. and A.F. designed experimental approaches. J.P., H.M.  
420 and A.F. performed, analyzed, and interpreted the experiments. B.H.H. and A.B.S. supplied  
421 novel/unique reagents. J.P. and A.F. wrote the paper. All authors have read, edited, and  
422 approved the final manuscript.

423

424 **DATA AVAILABILITY**

425 All data are contained within the article.

426

427 **CONFLICT OF INTEREST**

428 The authors declare no competing interests.

429

430 **REFERENCES**

- 431 1. Earl, P. L.; Doms, R. W.; Moss, B., Oligomeric structure of the human immunodeficiency  
432 virus type 1 envelope glycoprotein. *Proc Natl Acad Sci U S A* **1990**, *87*, (2), 648-52.
- 433 2. Earl, P. L.; Moss, B.; Doms, R. W., Folding, interaction with GRP78-BiP, assembly, and  
434 transport of the human immunodeficiency virus type 1 envelope protein. *J Virol* **1991**, *65*,  
435 (4), 2047-55.
- 436 3. Kantanen, M. L.; Leinikki, P.; Kuismanen, E., Endoproteolytic cleavage of HIV-1 gp160  
437 envelope precursor occurs after exit from the trans-Golgi network (TGN). *Arch Virol*  
438 **1995**, *140*, (8), 1441-9.
- 439 4. Qi, M.; Williams, J. A.; Chu, H.; Chen, X.; Wang, J. J.; Ding, L.; Akhirome, E.; Wen, X.;  
440 Lapierre, L. A.; Goldenring, J. R.; Spearman, P., Rab11-FIP1C and Rab14 direct plasma  
441 membrane sorting and particle incorporation of the HIV-1 envelope glycoprotein  
442 complex. *PLoS Pathog* **2013**, *9*, (4), e1003278.
- 443 5. Kirschman, J.; Qi, M.; Ding, L.; Hammonds, J.; Dienger-Stambaugh, K.; Wang, J. J.;  
444 Lapierre, L. A.; Goldenring, J. R.; Spearman, P., HIV-1 Envelope Glycoprotein  
445 Trafficking through the Endosomal Recycling Compartment Is Required for Particle  
446 Incorporation. *J Virol* **2018**, *92*, (5).
- 447 6. Freed, E. O.; Myers, D. J.; Risser, R., Mutational analysis of the cleavage sequence of  
448 the human immunodeficiency virus type 1 envelope glycoprotein precursor gp160. *J*  
449 *Virol* **1989**, *63*, (11), 4670-5.
- 450 7. Bosch, V.; Pawlita, M., Mutational analysis of the human immunodeficiency virus type 1  
451 env gene product proteolytic cleavage site. *J Virol* **1990**, *64*, (5), 2337-44.
- 452 8. McCune, J. M.; Rabin, L. B.; Feinberg, M. B.; Lieberman, M.; Kosek, J. C.; Reyes, G. R.;  
453 Weissman, I. L., Endoproteolytic cleavage of gp160 is required for the activation of  
454 human immunodeficiency virus. *Cell* **1988**, *53*, (1), 55-67.
- 455 9. Leonard, C. K.; Spellman, M. W.; Riddle, L.; Harris, R. J.; Thomas, J. N.; Gregory, T. J.,  
456 Assignment of intrachain disulfide bonds and characterization of potential glycosylation  
457 sites of the type 1 recombinant human immunodeficiency virus envelope glycoprotein  
458 (gp120) expressed in Chinese hamster ovary cells. *J Biol Chem* **1990**, *265*, (18), 10373-  
459 82.
- 460 10. Bernstein, H. B.; Tucker, S. P.; Hunter, E.; Schutzbach, J. S.; Compans, R. W., Human  
461 immunodeficiency virus type 1 envelope glycoprotein is modified by O-linked  
462 oligosaccharides. *J Virol* **1994**, *68*, (1), 463-8.
- 463 11. Dewar, R. L.; Vasudevachari, M. B.; Natarajan, V.; Salzman, N. P., Biosynthesis and  
464 processing of human immunodeficiency virus type 1 envelope glycoproteins: effects of  
465 monensin on glycosylation and transport. *J Virol* **1989**, *63*, (6), 2452-6.
- 466 12. Hallenberger, S.; Bosch, V.; Angliker, H.; Shaw, E.; Klenk, H. D.; Garten, W., Inhibition  
467 of furin-mediated cleavage activation of HIV-1 glycoprotein gp160. *Nature* **1992**, *360*,  
468 (6402), 358-61.
- 469 13. Decroly, E.; Vandenbranden, M.; Ruyschaert, J. M.; Cogniaux, J.; Jacob, G. S.;  
470 Howard, S. C.; Marshall, G.; Kompelli, A.; Basak, A.; Jean, F.; et al., The convertases  
471 furin and PC1 can both cleave the human immunodeficiency virus (HIV)-1 envelope  
472 glycoprotein gp160 into gp120 (HIV-1 SU) and gp41 (HIV-1 TM). *J Biol Chem* **1994**, *269*,  
473 (16), 12240-7.
- 474 14. Decroly, E.; Wouters, S.; Di Bello, C.; Lazure, C.; Ruyschaert, J. M.; Seidah, N. G.,  
475 Identification of the paired basic convertases implicated in HIV gp160 processing based  
476 on in vitro assays and expression in CD4(+) cell lines. *J Biol Chem* **1996**, *271*, (48),  
477 30442-50.

- 478 15. Decroly, E.; Benjannet, S.; Savaria, D.; Seidah, N. G., Comparative functional role of  
479 PC7 and furin in the processing of the HIV envelope glycoprotein gp160. *FEBS Lett*  
480 **1997**, 405, (1), 68-72.
- 481 16. Molloy, S. S.; Thomas, L.; VanSlyke, J. K.; Stenberg, P. E.; Thomas, G., Intracellular  
482 trafficking and activation of the furin proprotein convertase: localization to the TGN and  
483 recycling from the cell surface. *EMBO J* **1994**, 13, (1), 18-33.
- 484 17. Dubay, J. W.; Dubay, S. R.; Shin, H. J.; Hunter, E., Analysis of the cleavage site of the  
485 human immunodeficiency virus type 1 glycoprotein: requirement of precursor cleavage  
486 for glycoprotein incorporation. *J Virol* **1995**, 69, (8), 4675-82.
- 487 18. Herrera, C.; Klasse, P. J.; Michael, E.; Kake, S.; Barnes, K.; Kibler, C. W.; Campbell-  
488 Gardener, L.; Si, Z.; Sodroski, J.; Moore, J. P.; Beddows, S., The impact of envelope  
489 glycoprotein cleavage on the antigenicity, infectivity, and neutralization sensitivity of Env-  
490 pseudotyped human immunodeficiency virus type 1 particles. *Virology* **2005**, 338, (1),  
491 154-72.
- 492 19. Pasquato, A.; Dettin, M.; Basak, A.; Gambaretto, R.; Tonin, L.; Seidah, N. G.; Di Bello,  
493 C., Heparin enhances the furin cleavage of HIV-1 gp160 peptides. *FEBS Lett* **2007**, 581,  
494 (30), 5807-13.
- 495 20. Munro, J. B.; Gorman, J.; Ma, X.; Zhou, Z.; Arthos, J.; Burton, D. R.; Koff, W. C.;  
496 Courter, J. R.; Smith, A. B., III; Kwong, P. D.; Blanchard, S. C.; Mothes, W.,  
497 Conformational dynamics of single HIV-1 envelope trimers on the surface of native  
498 virions. *Science* **2014**, 346, (6210), 759-63.
- 499 21. Ma, X.; Lu, M.; Gorman, J.; Terry, D. S.; Hong, X.; Zhou, Z.; Zhao, H.; Altman, R. B.;  
500 Arthos, J.; Blanchard, S. C.; Kwong, P. D.; Munro, J. B.; Mothes, W., HIV-1 Env trimer  
501 opens through an asymmetric intermediate in which individual protomers adopt distinct  
502 conformations. *Elife* **2018**, 7.
- 503 22. Lu, M.; Ma, X.; Castillo-Menendez, L. R.; Gorman, J.; Alsaifi, N.; Ermel, U.; Terry, D.  
504 S.; Chambers, M.; Peng, D.; Zhang, B.; Zhou, T.; Reichard, N.; Wang, K.; Grover, J. R.;  
505 Carman, B. P.; Gardner, M. R.; Nikic-Spiegel, I.; Sugawara, A.; Arthos, J.; Lemke, E. A.;  
506 Smith, A. B., III; Farzan, M.; Abrams, C.; Munro, J. B.; McDermott, A. B.; Finzi, A.;  
507 Kwong, P. D.; Blanchard, S. C.; Sodroski, J. G.; Mothes, W., Associating HIV-1 envelope  
508 glycoprotein structures with states on the virus observed by smFRET. *Nature* **2019**.
- 509 23. Li, Z.; Li, W.; Lu, M.; Bess, J., Jr.; Chao, C. W.; Gorman, J.; Terry, D. S.; Zhang, B.;  
510 Zhou, T.; Blanchard, S. C.; Kwong, P. D.; Lifson, J. D.; Mothes, W.; Liu, J.,  
511 Subnanometer structures of HIV-1 envelope trimers on aldrithiol-2-inactivated virus  
512 particles. *Nat Struct Mol Biol* **2020**, 27, (8), 726-734.
- 513 24. Stadtmueller, B. M.; Bridges, M. D.; Dam, K. M.; Lerch, M. T.; Huey-Tubman, K. E.;  
514 Hubbell, W. L.; Bjorkman, P. J., DEER Spectroscopy Measurements Reveal Multiple  
515 Conformations of HIV-1 SOSIP Envelopes that Show Similarities with Envelopes on  
516 Native Virions. *Immunity* **2018**, 49, (2), 235-246 e4.
- 517 25. Finzi, A.; Xiang, S. H.; Pacheco, B.; Wang, L.; Haight, J.; Kassa, A.; Danek, B.; Pancera,  
518 M.; Kwong, P. D.; Sodroski, J., Topological layers in the HIV-1 gp120 inner domain  
519 regulate gp41 interaction and CD4-triggered conformational transitions. *Mol Cell* **2010**,  
520 37, (5), 656-67.
- 521 26. Veillette, M.; Desormeaux, A.; Medjahed, H.; Gharsallah, N. E.; Coutu, M.; Baalwa, J.;  
522 Guan, Y.; Lewis, G.; Ferrari, G.; Hahn, B. H.; Haynes, B. F.; Robinson, J. E.; Kaufmann,  
523 D. E.; Bonsignori, M.; Sodroski, J.; Finzi, A., Interaction with cellular CD4 exposes HIV-1  
524 envelope epitopes targeted by antibody-dependent cell-mediated cytotoxicity. *J Virol*  
525 **2014**, 88, (5), 2633-44.
- 526 27. Decker, J. M.; Bibollet-Ruche, F.; Wei, X.; Wang, S.; Levy, D. N.; Wang, W.; Delaporte,  
527 E.; Peeters, M.; Derdeyn, C. A.; Allen, S.; Hunter, E.; Saag, M. S.; Hoxie, J. A.; Hahn, B.

- 528 H.; Kwong, P. D.; Robinson, J. E.; Shaw, G. M., Antigenic conservation and  
529 immunogenicity of the HIV coreceptor binding site. *J Exp Med* **2005**, 201, (9), 1407-19.
- 530 28. Tomaras, G. D.; Yates, N. L.; Liu, P.; Qin, L.; Fouda, G. G.; Chavez, L. L.; Decamp, A.  
531 C.; Parks, R. J.; Ashley, V. C.; Lucas, J. T.; Cohen, M.; Eron, J.; Hicks, C. B.; Liao, H. X.;  
532 Self, S. G.; Landucci, G.; Forthal, D. N.; Weinhold, K. J.; Keele, B. F.; Hahn, B. H.;  
533 Greenberg, M. L.; Morris, L.; Karim, S. S.; Blattner, W. A.; Montefiori, D. C.; Shaw, G.  
534 M.; Perelson, A. S.; Haynes, B. F., Initial B-cell responses to transmitted human  
535 immunodeficiency virus type 1: virion-binding immunoglobulin M (IgM) and IgG  
536 antibodies followed by plasma anti-gp41 antibodies with ineffective control of initial  
537 viremia. *J Virol* **2008**, 82, (24), 12449-63.
- 538 29. Tomaras, G. D.; Haynes, B. F., HIV-1-specific antibody responses during acute and  
539 chronic HIV-1 infection. *Curr Opin HIV AIDS* **2009**, 4, (5), 373-9.
- 540 30. Davis, K. L.; Gray, E. S.; Moore, P. L.; Decker, J. M.; Salomon, A.; Montefiori, D. C.;  
541 Graham, B. S.; Keefer, M. C.; Pinter, A.; Morris, L.; Hahn, B. H.; Shaw, G. M., High titer  
542 HIV-1 V3-specific antibodies with broad reactivity but low neutralizing potency in acute  
543 infection and following vaccination. *Virology* **2009**, 387, (2), 414-26.
- 544 31. Madani, N.; Princiotta, A. M.; Easterhoff, D.; Bradley, T.; Luo, K.; Williams, W. B.; Liao,  
545 H. X.; Moody, M. A.; Phad, G. E.; Vazquez Bernat, N.; Melillo, B.; Santra, S.; Smith, A.  
546 B., III; Karlsson Hedestam, G. B.; Haynes, B.; Sodroski, J., Antibodies Elicited by  
547 Multiple Envelope Glycoprotein Immunogens in Primates Neutralize Primary Human  
548 Immunodeficiency Viruses (HIV-1) Sensitized by CD4-Mimetic Compounds. *J Virol* **2016**,  
549 90, (10), 5031-46.
- 550 32. Madani, N.; Princiotta, A. M.; Mach, L.; Ding, S.; Prevost, J.; Richard, J.; Hora, B.;  
551 Sutherland, L.; Zhao, C. A.; Conn, B. P.; Bradley, T.; Moody, M. A.; Melillo, B.; Finzi, A.;  
552 Haynes, B. F.; Smith, A. B., III; Santra, S.; Sodroski, J., A CD4-mimetic compound  
553 enhances vaccine efficacy against stringent immunodeficiency virus challenge. *Nat*  
554 *Commun* **2018**, 9, (1), 2363.
- 555 33. Ferrari, G.; Pollara, J.; Kozink, D.; Harms, T.; Drinker, M.; Freel, S.; Moody, M. A.; Alam,  
556 S. M.; Tomaras, G. D.; Ochsenbauer, C.; Kappes, J. C.; Shaw, G. M.; Hoxie, J. A.;  
557 Robinson, J. E.; Haynes, B. F., An HIV-1 gp120 envelope human monoclonal antibody  
558 that recognizes a C1 conformational epitope mediates potent antibody-dependent  
559 cellular cytotoxicity (ADCC) activity and defines a common ADCC epitope in human HIV-  
560 1 serum. *J Virol* **2011**, 85, (14), 7029-36.
- 561 34. Guan, Y.; Pazgier, M.; Sajadi, M. M.; Kamin-Lewis, R.; Al-Darmarki, S.; Flinko, R.; Lovo,  
562 E.; Wu, X.; Robinson, J. E.; Seaman, M. S.; Fouts, T. R.; Gallo, R. C.; DeVico, A. L.;  
563 Lewis, G. K., Diverse specificity and effector function among human antibodies to HIV-1  
564 envelope glycoprotein epitopes exposed by CD4 binding. *Proc Natl Acad Sci U S A*  
565 **2013**, 110, (1), E69-78.
- 566 35. Veillette, M.; Coutu, M.; Richard, J.; Batrville, L. A.; Dagher, O.; Bernard, N.; Tremblay,  
567 C.; Kaufmann, D. E.; Roger, M.; Finzi, A., The HIV-1 gp120 CD4-Bound Conformation Is  
568 Preferentially Targeted by Antibody-Dependent Cellular Cytotoxicity-Mediating  
569 Antibodies in Sera from HIV-1-Infected Individuals. *J Virol* **2015**, 89, (1), 545-51.
- 570 36. Richard, J.; Veillette, M.; Brassard, N.; Iyer, S. S.; Roger, M.; Martin, L.; Pazgier, M.;  
571 Schon, A.; Freire, E.; Routy, J. P.; Smith, A. B., III; Park, J.; Jones, D. M.; Courter, J. R.;  
572 Melillo, B. N.; Kaufmann, D. E.; Hahn, B. H.; Permar, S. R.; Haynes, B. F.; Madani, N.;  
573 Sodroski, J. G.; Finzi, A., CD4 mimetics sensitize HIV-1-infected cells to ADCC. *Proc*  
574 *Natl Acad Sci U S A* **2015**, 112, (20), E2687-94.
- 575 37. Ding, S.; Veillette, M.; Coutu, M.; Prevost, J.; Scharf, L.; Bjorkman, P. J.; Ferrari, G.;  
576 Robinson, J. E.; Sturzel, C.; Hahn, B. H.; Sauter, D.; Kirchhoff, F.; Lewis, G. K.; Pazgier,  
577 M.; Finzi, A., A Highly Conserved Residue of the HIV-1 gp120 Inner Domain Is Important

- 578 for Antibody-Dependent Cellular Cytotoxicity Responses Mediated by Anti-cluster A  
579 Antibodies. *J Virol* **2016**, 90, (4), 2127-34.
- 580 38. Ding, S.; Verly, M. M.; Princiotta, A.; Melillo, B.; Moody, T.; Bradley, T.; Easterhoff, D.;  
581 Roger, M.; Hahn, B. H.; Madani, N.; Smith, A. B., III; Haynes, B. F.; Sodroski, J. G.;  
582 Finzi, A., Small Molecule CD4-Mimetics Sensitize HIV-1-infected Cells to ADCC by  
583 Antibodies Elicited by Multiple Envelope Glycoprotein Immunogens in Non-Human  
584 Primates. *AIDS Res Hum Retroviruses* **2016**.
- 585 39. Veillette, M.; Coutu, M.; Richard, J.; Batrville, L. A.; Desormeaux, A.; Roger, M.; Finzi,  
586 A., Conformational evaluation of HIV-1 trimeric envelope glycoproteins using a cell-  
587 based ELISA assay. *J Vis Exp* **2014**, (91), 51995.
- 588 40. Alsahafi, N.; Bakouche, N.; Kazemi, M.; Richard, J.; Ding, S.; Bhattacharyya, S.; Das,  
589 D.; Anand, S. P.; Prevost, J.; Tolbert, W. D.; Lu, H.; Medjahed, H.; Gendron-Lepage, G.;  
590 Ortega Delgado, G. G.; Kirk, S.; Melillo, B.; Mothes, W.; Sodroski, J.; Smith, A. B., III;  
591 Kaufmann, D. E.; Wu, X.; Pazgier, M.; Rouiller, I.; Finzi, A.; Munro, J. B., An Asymmetric  
592 Opening of HIV-1 Envelope Mediates Antibody-Dependent Cellular Cytotoxicity. *Cell*  
593 *Host Microbe* **2019**, 25, (4), 578-587 e5.
- 594 41. Willey, R. L.; Maldarelli, F.; Martin, M. A.; Strebel, K., Human immunodeficiency virus  
595 type 1 Vpu protein induces rapid degradation of CD4. *J Virol* **1992**, 66, (12), 7193-200.
- 596 42. Rhee, S. S.; Marsh, J. W., Human immunodeficiency virus type 1 Nef-induced down-  
597 modulation of CD4 is due to rapid internalization and degradation of surface CD4. *J Virol*  
598 **1994**, 68, (8), 5156-63.
- 599 43. Madani, N.; Schon, A.; Princiotta, A. M.; Lalonde, J. M.; Courter, J. R.; Soeta, T.; Ng, D.;  
600 Wang, L.; Brower, E. T.; Xiang, S. H.; Do Kwon, Y.; Huang, C. C.; Wyatt, R.; Kwong, P.  
601 D.; Freire, E.; Smith, A. B., III; Sodroski, J., Small-molecule CD4 mimics interact with a  
602 highly conserved pocket on HIV-1 gp120. *Structure* **2008**, 16, (11), 1689-701.
- 603 44. Madani, N.; Princiotta, A. M.; Schon, A.; LaLonde, J.; Feng, Y.; Freire, E.; Park, J.;  
604 Courter, J. R.; Jones, D. M.; Robinson, J.; Liao, H. X.; Moody, M. A.; Permar, S.;  
605 Haynes, B.; Smith, A. B., III; Wyatt, R.; Sodroski, J., CD4-mimetic small molecules  
606 sensitize human immunodeficiency virus to vaccine-elicited antibodies. *J Virol* **2014**, 88,  
607 (12), 6542-55.
- 608 45. Madani, N.; Princiotta, A. M.; Zhao, C.; Jahanbakhshsefidi, F.; Mertens, M.; Herschhorn,  
609 A.; Melillo, B.; Smith, A. B., III; Sodroski, J., Activation and Inactivation of Primary  
610 Human Immunodeficiency Virus Envelope Glycoprotein Trimers by CD4-Mimetic  
611 Compounds. *J Virol* **2017**, 91, (3).
- 612 46. Princiotta, A. M.; Vrbanac, V. D.; Melillo, B.; Park, J.; Tager, A. M.; Smith, A. B., III;  
613 Sodroski, J.; Madani, N., A Small-Molecule CD4-Mimetic Compound Protects Bone  
614 Marrow-Liver-Thymus Humanized Mice From HIV-1 Infection. *J Infect Dis* **2018**, 218, (3),  
615 471-475.
- 616 47. Lee, W. S.; Richard, J.; Lichtfuss, M.; Smith, A. B., III; Park, J.; Courter, J. R.; Melillo, B.  
617 N.; Sodroski, J. G.; Kaufmann, D. E.; Finzi, A.; Parsons, M. S.; Kent, S. J., Antibody-  
618 Dependent Cellular Cytotoxicity against Reactivated HIV-1-Infected Cells. *J Virol* **2015**,  
619 90, (4), 2021-30.
- 620 48. Richard, J.; Pacheco, B.; Gohain, N.; Veillette, M.; Ding, S.; Alsahafi, N.; Tolbert, W. D.;  
621 Prevost, J.; Chapleau, J. P.; Coutu, M.; Jia, M.; Brassard, N.; Park, J.; Courter, J. R.;  
622 Melillo, B.; Martin, L.; Tremblay, C.; Hahn, B. H.; Kaufmann, D. E.; Wu, X.; Smith, A. B.,  
623 III; Sodroski, J.; Pazgier, M.; Finzi, A., Co-receptor Binding Site Antibodies Enable CD4-  
624 Mimetics to Expose Conserved Anti-cluster A ADCC Epitopes on HIV-1 Envelope  
625 Glycoproteins. *EBioMedicine* **2016**, 12, 208-218.
- 626 49. Anand, S. P.; Prevost, J.; Baril, S.; Richard, J.; Medjahed, H.; Chapleau, J. P.; Tolbert,  
627 W. D.; Kirk, S.; Smith, A. B., III; Wines, B. D.; Kent, S. J.; Hogarth, P. M.; Parsons, M. S.;



- 628 Pazgier, M.; Finzi, A., Two Families of Env Antibodies Efficiently Engage Fc-Gamma  
629 Receptors and Eliminate HIV-1-Infected Cells. *J Virol* **2019**, 93, (3).
- 630 50. Ding, S.; Grenier, M. C.; Tolbert, W. D.; Vezina, D.; Sherburn, R.; Richard, J.; Prevost,  
631 J.; Chapleau, J. P.; Gendron-Lepage, G.; Medjahed, H.; Abrams, C.; Sodroski, J.;  
632 Pazgier, M.; Smith, A. B., III; Finzi, A., A New Family of Small-Molecule CD4-Mimetic  
633 Compounds Contacts Highly Conserved Aspartic Acid 368 of HIV-1 gp120 and Mediates  
634 Antibody-Dependent Cellular Cytotoxicity. *J Virol* **2019**, 93, (24).
- 635 51. Prevost, J.; Tolbert, W. D.; Medjahed, H.; Sherburn, R. T.; Madani, N.; Zoubchenok, D.;  
636 Gendron-Lepage, G.; Gaffney, A. E.; Grenier, M. C.; Kirk, S.; Vergara, N.; Han, C.;  
637 Mann, B. T.; Chenine, A. L.; Ahmed, A.; Chaiken, I.; Kirchhoff, F.; Hahn, B. H.; Haim, H.;  
638 Abrams, C. F.; Smith, A. B., III; Sodroski, J.; Pazgier, M.; Finzi, A., The HIV-1 Env gp120  
639 Inner Domain Shapes the Phe43 Cavity and the CD4 Binding Site. *mBio* **2020**, 11, (3).
- 640 52. Vezina, D.; Gong, S. Y.; Tolbert, W. D.; Ding, S.; Nguyen, D.; Richard, J.; Gendron-  
641 Lepage, G.; Melillo, B.; Smith, A. B., III; Pazgier, M.; Finzi, A., Stabilizing the HIV-1  
642 envelope glycoprotein State 2A conformation. *J Virol* **2020**.
- 643 53. Rajashekar, J. K.; Richard, J.; Beloor, J.; Prevost, J.; Anand, S. P.; Beaudoin-Bussieres,  
644 G.; Shan, L.; Herndler-Brandstetter, D.; Gendron-Lepage, G.; Medjahed, H.; Bourassa,  
645 C.; Gaudette, F.; Ullah, I.; Symmes, K.; Peric, A.; Lindemuth, E.; Bibollet-Ruche, F.;  
646 Park, J.; Chen, H. C.; Kaufmann, D. E.; Hahn, B. H.; Sodroski, J.; Pazgier, M.; Flavell, R.  
647 A.; Smith, A. B., III; Finzi, A.; Kumar, P., Modulating HIV-1 envelope glycoprotein  
648 conformation to decrease the HIV-1 reservoir. *Cell Host Microbe* **2021**, 29, (6), 904-916  
649 e6.
- 650 54. Zou, S.; Zhang, S.; Gaffney, A.; Ding, H.; Lu, M.; Grover, J. R.; Farrell, M.; Nguyen, H.  
651 T.; Zhao, C.; Anang, S.; Zhao, M.; Mohammadi, M.; Blanchard, S. C.; Abrams, C.;  
652 Madani, N.; Mothes, W.; Kappes, J. C.; Smith, A. B., III; Sodroski, J., Long-Acting BMS-  
653 378806 Analogues Stabilize the State-1 Conformation of the Human Immunodeficiency  
654 Virus (HIV-1) Envelope Glycoproteins. *J Virol* **2020**.
- 655 55. Lu, M.; Ma, X.; Reichard, N.; Terry, D. S.; Arthos, J.; Smith, A. B., III; Sodroski, J. G.;  
656 Blanchard, S. C.; Mothes, W., Shedding-Resistant HIV-1 Envelope Glycoproteins Adopt  
657 Downstream Conformations That Remain Responsive to Conformation-Preferring  
658 Ligands. *J Virol* **2020**, 94, (17).
- 659 56. Xiang, S. H.; Kwong, P. D.; Gupta, R.; Rizzuto, C. D.; Casper, D. J.; Wyatt, R.; Wang, L.;  
660 Hendrickson, W. A.; Doyle, M. L.; Sodroski, J., Mutagenic stabilization and/or disruption  
661 of a CD4-bound state reveals distinct conformations of the human immunodeficiency  
662 virus type 1 gp120 envelope glycoprotein. *J Virol* **2002**, 76, (19), 9888-99.
- 663 57. Herschhorn, A.; Ma, X.; Gu, C.; Ventura, J. D.; Castillo-Menendez, L.; Melillo, B.; Terry,  
664 D. S.; Smith, A. B., III; Blanchard, S. C.; Munro, J. B.; Mothes, W.; Finzi, A.; Sodroski, J.,  
665 Release of gp120 Restraints Leads to an Entry-Competent Intermediate State of the  
666 HIV-1 Envelope Glycoproteins. *MBio* **2016**, 7, (5).
- 667 58. Desormeaux, A.; Coutu, M.; Medjahed, H.; Pacheco, B.; Herschhorn, A.; Gu, C.; Xiang,  
668 S. H.; Mao, Y.; Sodroski, J.; Finzi, A., The highly conserved layer-3 component of the  
669 HIV-1 gp120 inner domain is critical for CD4-required conformational transitions. *J Virol*  
670 **2013**, 87, (5), 2549-62.
- 671 59. Vilmen, G.; Smith, A. C.; Benet, H. C.; Shukla, R. K.; Larue, R. C.; Herschhorn, A.;  
672 Sharma, A., Conformation of HIV-1 Envelope governs rhesus CD4 usage and simian-  
673 human immunodeficiency virus replication. *bioRxiv* **2021**.
- 674 60. Prevost, J.; Zoubchenok, D.; Richard, J.; Veillette, M.; Pacheco, B.; Coutu, M.; Brassard,  
675 N.; Parsons, M. S.; Ruxrungtham, K.; Bunupuradah, T.; Tovanabutra, S.; Hwang, K. K.;  
676 Moody, M. A.; Haynes, B. F.; Bonsignori, M.; Sodroski, J.; Kaufmann, D. E.; Shaw, G.  
677 M.; Chenine, A. L.; Finzi, A., Influence of the Envelope gp120 Phe 43 Cavity on HIV-1

- 678 Sensitivity to Antibody-Dependent Cell-Mediated Cytotoxicity Responses. *J Virol* **2017**,  
679 91, (7).
- 680 61. Prevost, J.; Richard, J.; Ding, S.; Pacheco, B.; Charlebois, R.; Hahn, B. H.; Kaufmann,  
681 D. E.; Finzi, A., Envelope glycoproteins sampling states 2/3 are susceptible to ADCC by  
682 sera from HIV-1-infected individuals. *Virology* **2018**, 515, 38-45.
- 683 62. Castillo-Menendez, L. R.; Witt, K.; Espy, N.; Princiotta, A.; Madani, N.; Pacheco, B.;  
684 Finzi, A.; Sodroski, J., Comparison of Uncleaved and Mature Human Immunodeficiency  
685 Virus Membrane Envelope Glycoprotein Trimers. *J Virol* **2018**, 92, (12).
- 686 63. Zhang, S.; Wang, K.; Wang, W. L.; Nguyen, H. T.; Chen, S.; Lu, M.; Go, E. P.; Ding, H.;  
687 Steinbock, R. T.; Desaire, H.; Kappes, J. C.; Sodroski, J.; Mao, Y., Asymmetric  
688 structures and conformational plasticity of the uncleaved full-length human  
689 immunodeficiency virus (HIV-1) envelope glycoprotein trimer. *J Virol* **2021**, JVI0052921.
- 690 64. Ringe, R. P.; Sanders, R. W.; Yasmeen, A.; Kim, H. J.; Lee, J. H.; Cupo, A.; Korzun, J.;  
691 Derking, R.; van Montfort, T.; Julien, J. P.; Wilson, I. A.; Klasse, P. J.; Ward, A. B.;  
692 Moore, J. P., Cleavage strongly influences whether soluble HIV-1 envelope glycoprotein  
693 trimers adopt a native-like conformation. *Proc Natl Acad Sci U S A* **2013**, 110, (45),  
694 18256-61.
- 695 65. Chakrabarti, B. K.; Pancera, M.; Phogat, S.; O'Dell, S.; McKee, K.; Guenaga, J.;  
696 Robinson, J.; Mascola, J.; Wyatt, R. T., HIV type 1 Env precursor cleavage state affects  
697 recognition by both neutralizing and nonneutralizing gp41 antibodies. *AIDS Res Hum*  
698 *Retroviruses* **2011**, 27, (8), 877-87.
- 699 66. Fontaine, J.; Chagnon-Choquet, J.; Valcke, H. S.; Poudrier, J.; Roger, M., High  
700 expression levels of B lymphocyte stimulator (BLyS) by dendritic cells correlate with HIV-  
701 related B-cell disease progression in humans. *Blood* **2011**, 117, (1), 145-55.
- 702 67. Fontaine, J.; Coutlee, F.; Tremblay, C.; Routy, J. P.; Poudrier, J.; Roger, M., HIV  
703 infection affects blood myeloid dendritic cells after successful therapy and despite  
704 nonprogressing clinical disease. *J Infect Dis* **2009**, 199, (7), 1007-18.
- 705 68. International, H. I. V. C. S.; Pereyra, F.; Jia, X.; McLaren, P. J.; Telenti, A.; de Bakker, P.  
706 I.; Walker, B. D.; Ripke, S.; Brumme, C. J.; Pulit, S. L.; Carrington, M.; Kadie, C. M.;  
707 Carlson, J. M.; Heckerman, D.; Graham, R. R.; Plenge, R. M.; Deeks, S. G.; Gianniny,  
708 L.; Crawford, G.; Sullivan, J.; Gonzalez, E.; Davies, L.; Camargo, A.; Moore, J. M.;  
709 Beattie, N.; Gupta, S.; Crenshaw, A.; Burt, N. P.; Guiducci, C.; Gupta, N.; Gao, X.; Qi,  
710 Y.; Yuki, Y.; Piechocka-Trocha, A.; Cutrell, E.; Rosenberg, R.; Moss, K. L.; Lemay, P.;  
711 O'Leary, J.; Schaefer, T.; Verma, P.; Toth, I.; Block, B.; Baker, B.; Rothchild, A.; Lian, J.;  
712 Proudfoot, J.; Alvino, D. M.; Vine, S.; Addo, M. M.; Allen, T. M.; Altfeld, M.; Henn, M. R.;  
713 Le Gall, S.; Streeck, H.; Haas, D. W.; Kuritzkes, D. R.; Robbins, G. K.; Shafer, R. W.;  
714 Gulick, R. M.; Shikuma, C. M.; Haubrich, R.; Riddler, S.; Sax, P. E.; Daar, E. S.;  
715 Ribardo, H. J.; Agan, B.; Agarwal, S.; Ahern, R. L.; Allen, B. L.; Altidor, S.; Altschuler, E.  
716 L.; Ambardar, S.; Anastos, K.; Anderson, B.; Anderson, V.; Andrady, U.; Antoniskis, D.;  
717 Bangsberg, D.; Barbaro, D.; Barrie, W.; Bartczak, J.; Barton, S.; Basden, P.; Basgoz, N.;  
718 Bazner, S.; Bellos, N. C.; Benson, A. M.; Berger, J.; Bernard, N. F.; Bernard, A. M.;  
719 Birch, C.; Bodner, S. J.; Bolan, R. K.; Boudreaux, E. T.; Bradley, M.; Braun, J. F.;  
720 Brndjar, J. E.; Brown, S. J.; Brown, K.; Brown, S. T.; Burack, J.; Bush, L. M.; Cafaro, V.;  
721 Campbell, O.; Campbell, J.; Carlson, R. H.; Carmichael, J. K.; Casey, K. K.; Cavacuiti,  
722 C.; Celestin, G.; Chambers, S. T.; Chez, N.; Chirch, L. M.; Cimocho, P. J.; Cohen, D.;  
723 Cohn, L. E.; Conway, B.; Cooper, D. A.; Cornelson, B.; Cox, D. T.; Cristofano, M. V.;  
724 Cuchural, G., Jr.; Czartoski, J. L.; Dahman, J. M.; Daly, J. S.; Davis, B. T.; Davis, K.;  
725 Davod, S. M.; DeJesus, E.; Dietz, C. A.; Dunham, E.; Dunn, M. E.; Ellerlin, T. B.; Eron, J.  
726 J.; Fangman, J. J.; Farel, C. E.; Ferlazzo, H.; Fidler, S.; Fleenor-Ford, A.; Frankel, R.;  
727 Freedberg, K. A.; French, N. K.; Fuchs, J. D.; Fuller, J. D.; Gaberman, J.; Gallant, J. E.;  
728 Gandhi, R. T.; Garcia, E.; Garmon, D.; Gathe, J. C., Jr.; Gaultier, C. R.; Gebre, W.;

- 729 Gilman, F. D.; Gilson, I.; Goepfert, P. A.; Gottlieb, M. S.; Goulston, C.; Groger, R. K.;  
730 Gurley, T. D.; Haber, S.; Hardwicke, R.; Hardy, W. D.; Harrigan, P. R.; Hawkins, T. N.;  
731 Heath, S.; Hecht, F. M.; Henry, W. K.; Hladik, M.; Hoffman, R. P.; Horton, J. M.; Hsu, R.  
732 K.; Huhn, G. D.; Hunt, P.; Hupert, M. J.; Illeman, M. L.; Jaeger, H.; Jellinger, R. M.; John,  
733 M.; Johnson, J. A.; Johnson, K. L.; Johnson, H.; Johnson, K.; Joly, J.; Jordan, W. C.;  
734 Kauffman, C. A.; Khanlou, H.; Killian, R. K.; Kim, A. Y.; Kim, D. D.; Kinder, C. A.;  
735 Kirchner, J. T.; Kogelman, L.; Kojic, E. M.; Korthuis, P. T.; Kurisu, W.; Kwon, D. S.;  
736 LaMar, M.; Lampiris, H.; Lanzafame, M.; Lederman, M. M.; Lee, D. M.; Lee, J. M.; Lee,  
737 M. J.; Lee, E. T.; Lemoine, J.; Levy, J. A.; Llibre, J. M.; Liguori, M. A.; Little, S. J.; Liu, A.  
738 Y.; Lopez, A. J.; Loutfy, M. R.; Loy, D.; Mohammed, D. Y.; Man, A.; Mansour, M. K.;  
739 Marconi, V. C.; Markowitz, M.; Marques, R.; Martin, J. N.; Martin, H. L., Jr.; Mayer, K. H.;  
740 McElrath, M. J.; McGhee, T. A.; McGovern, B. H.; McGowan, K.; McIntyre, D.; McLeod,  
741 G. X.; Menezes, P.; Mesa, G.; Metroka, C. E.; Meyer-Olson, D.; Miller, A. O.;  
742 Montgomery, K.; Mounzer, K. C.; Nagami, E. H.; Nagin, I.; Nahass, R. G.; Nelson, M. O.;  
743 Nielsen, C.; Norene, D. L.; O'Connor, D. H.; Ojikutu, B. O.; Okulicz, J.; Oladehin, O. O.;  
744 Oldfield, E. C., 3rd; Olender, S. A.; Ostrowski, M.; Owen, W. F., Jr.; Pae, E.; Parsonnet,  
745 J.; Pavlatos, A. M.; Perlmutter, A. M.; Pierce, M. N.; Pincus, J. M.; Pisani, L.; Price, L. J.;  
746 Proia, L.; Prokesch, R. C.; Pujet, H. C.; Ramgopal, M.; Rathod, A.; Rausch, M.;  
747 Ravishankar, J.; Rhame, F. S.; Richards, C. S.; Richman, D. D.; Rodes, B.; Rodriguez,  
748 M.; Rose, R. C., III; Rosenberg, E. S.; Rosenthal, D.; Ross, P. E.; Rubin, D. S.;  
749 Rumbaugh, E.; Saenz, L.; Salvaggio, M. R.; Sanchez, W. C.; Sanjana, V. M.; Santiago,  
750 S.; Schmidt, W.; Schuitemaker, H.; Sestak, P. M.; Shalit, P.; Shay, W.; Shirvani, V. N.;  
751 Silebi, V. I.; Sizemore, J. M., Jr.; Skolnik, P. R.; Sokol-Anderson, M.; Sosman, J. M.;  
752 Stabile, P.; Stapleton, J. T.; Starrett, S.; Stein, F.; Stellbrink, H. J.; Sterman, F. L.; Stone,  
753 V. E.; Stone, D. R.; Tambussi, G.; Taplitz, R. A.; Tedaldi, E. M.; Telenti, A.; Theisen, W.;  
754 Torres, R.; Tosiello, L.; Tremblay, C.; Tribble, M. A.; Trinh, P. D.; Tsao, A.; Ueda, P.;  
755 Vaccaro, A.; Valadas, E.; Vanig, T. J.; Vecino, I.; Vega, V. M.; Veikley, W.; Wade, B. H.;  
756 Walworth, C.; Wanidworanun, C.; Ward, D. J.; Warner, D. A.; Weber, R. D.; Webster, D.;  
757 Weis, S.; Wheeler, D. A.; White, D. J.; Wilkins, E.; Winston, A.; Wlodaver, C. G.; van't  
758 Wout, A.; Wright, D. P.; Yang, O. O.; Yuridin, D. L.; Zabukovic, B. W.; Zachary, K. C.;  
759 Zeeman, B.; Zhao, M., The major genetic determinants of HIV-1 control affect HLA class  
760 I peptide presentation. *Science* **2010**, 330, (6010), 1551-7.
- 761 69. Kanya, P.; Boulet, S.; Tsoukas, C. M.; Routy, J. P.; Thomas, R.; Cote, P.; Boulassel, M.  
762 R.; Baril, J. G.; Kovacs, C.; Migueles, S. A.; Connors, M.; Suscovich, T. J.; Brander, C.;  
763 Tremblay, C. L.; Bernard, N., Receptor-ligand requirements for increased NK cell  
764 polyfunctional potential in slow progressors infected with HIV-1 coexpressing  
765 KIR3DL1\**h*/\**y* and HLA-B\*57. *J Virol* **2011**, 85, (12), 5949-60.
- 766 70. Peretz, Y.; Ndongala, M. L.; Boulet, S.; Boulassel, M. R.; Rouleau, D.; Cote, P.; Longpre,  
767 D.; Routy, J. P.; Falutz, J.; Tremblay, C.; Tsoukas, C. M.; Sekaly, R. P.; Bernard, N. F.,  
768 Functional T cell subsets contribute differentially to HIV peptide-specific responses  
769 within infected individuals: correlation of these functional T cell subsets with markers of  
770 disease progression. *Clin Immunol* **2007**, 124, (1), 57-68.
- 771 71. Platt, E. J.; Wehrly, K.; Kuhmann, S. E.; Chesebro, B.; Kabat, D., Effects of CCR5 and  
772 CD4 cell surface concentrations on infections by macrophagetropic isolates of human  
773 immunodeficiency virus type 1. *J Virol* **1998**, 72, (4), 2855-64.
- 774 72. Chen, J.; Park, J.; Kirk, S. M.; Chen, H. C.; Li, X.; Lippincott, D. J.; Melillo, B.; Smith, A.  
775 B., III, Development of an Effective Scalable Enantioselective Synthesis of the HIV-1  
776 Entry Inhibitor BNM-III-170 as the Bis-Trifluoroacetate Salt. *Org Process Res Dev* **2019**,  
777 23, (11), 2464-2469.
- 778 73. Emi, N.; Friedmann, T.; Yee, J. K., Pseudotype formation of murine leukemia virus with  
779 the G protein of vesicular stomatitis virus. *J Virol* **1991**, 65, (3), 1202-7.

- 780 74. Salazar-Gonzalez, J. F.; Salazar, M. G.; Keele, B. F.; Learn, G. H.; Giorgi, E. E.; Li, H.;  
781 Decker, J. M.; Wang, S.; Baalwa, J.; Kraus, M. H.; Parrish, N. F.; Shaw, K. S.; Guffey, M.  
782 B.; Bar, K. J.; Davis, K. L.; Ochsenbauer-Jambor, C.; Kappes, J. C.; Saag, M. S.; Cohen,  
783 M. S.; Mulenga, J.; Derdeyn, C. A.; Allen, S.; Hunter, E.; Markowitz, M.; Hraber, P.;  
784 Perelson, A. S.; Bhattacharya, T.; Haynes, B. F.; Korber, B. T.; Hahn, B. H.; Shaw, G.  
785 M., Genetic identity, biological phenotype, and evolutionary pathways of  
786 transmitted/founder viruses in acute and early HIV-1 infection. *J Exp Med* **2009**, 206, (6),  
787 1273-89.
- 788 75. Ochsenbauer, C.; Edmonds, T. G.; Ding, H.; Keele, B. F.; Decker, J.; Salazar, M. G.;  
789 Salazar-Gonzalez, J. F.; Shattock, R.; Haynes, B. F.; Shaw, G. M.; Hahn, B. H.; Kappes,  
790 J. C., Generation of Transmitted/Founder HIV-1 Infectious Molecular Clones and  
791 Characterization of Their Replication Capacity in CD4 T Lymphocytes and Monocyte-  
792 Derived Macrophages. *J Virol* **2012**, 86, (5), 2715-28.
- 793 76. Parrish, N. F.; Gao, F.; Li, H.; Giorgi, E. E.; Barbian, H. J.; Parrish, E. H.; Zajic, L.; Iyer,  
794 S. S.; Decker, J. M.; Kumar, A.; Hora, B.; Berg, A.; Cai, F.; Hopper, J.; Denny, T. N.;  
795 Ding, H.; Ochsenbauer, C.; Kappes, J. C.; Galimidi, R. P.; West, A. P., Jr.; Bjorkman, P.  
796 J.; Wilen, C. B.; Doms, R. W.; O'Brien, M.; Bhardwaj, N.; Borrow, P.; Haynes, B. F.;  
797 Muldoon, M.; Theiler, J. P.; Korber, B.; Shaw, G. M.; Hahn, B. H., Phenotypic properties  
798 of transmitted founder HIV-1. *Proc Natl Acad Sci U S A* **2013**, 110, (17), 6626-33.
- 799 77. Fenton-May, A. E.; Dibben, O.; Emmerich, T.; Ding, H.; Pfafferott, K.; Aasa-Chapman,  
800 M. M.; Pellegrino, P.; Williams, I.; Cohen, M. S.; Gao, F.; Shaw, G. M.; Hahn, B. H.;  
801 Ochsenbauer, C.; Kappes, J. C.; Borrow, P., Relative resistance of HIV-1 founder  
802 viruses to control by interferon-alpha. *Retrovirology* **2013**, 10, 146.
- 803 78. Rho, H. M.; Poesz, B.; Ruscetti, F. W.; Gallo, R. C., Characterization of the reverse  
804 transcriptase from a new retrovirus (HTLV) produced by a human cutaneous T-cell  
805 lymphoma cell line. *Virology* **1981**, 112, (1), 355-60.
- 806 79. Ding, S.; Gasser, R.; Gendron-Lepage, G.; Medjahed, H.; Tolbert, W. D.; Sodroski, J.;  
807 Pazgier, M.; Finzi, A., CD4 Incorporation into HIV-1 Viral Particles Exposes Envelope  
808 Epitopes Recognized by CD4-Induced Antibodies. *J Virol* **2019**, 93, (22).
- 809 80. Si, Z.; Phan, N.; Kiprilov, E.; Sodroski, J., Effects of HIV type 1 envelope glycoprotein  
810 proteolytic processing on antigenicity. *AIDS Res Hum Retroviruses* **2003**, 19, (3), 217-  
811 26.
- 812 81. Yang, X.; Kurteva, S.; Lee, S.; Sodroski, J., Stoichiometry of antibody neutralization of  
813 human immunodeficiency virus type 1. *J Virol* **2005**, 79, (6), 3500-8.
- 814 82. Brandenburg, O. F.; Magnus, C.; Rusert, P.; Regoes, R. R.; Trkola, A., Different  
815 infectivity of HIV-1 strains is linked to number of envelope trimers required for entry.  
816 *PLoS Pathog* **2015**, 11, (1), e1004595.
- 817 83. Stieh, D. J.; King, D. F.; Klein, K.; Aldon, Y.; McKay, P. F.; Shattock, R. J., Discrete  
818 partitioning of HIV-1 Env forms revealed by viral capture. *Retrovirology* **2015**, 12, 81.
- 819 84. Zhang, S.; Nguyen, H. T.; Ding, H.; Wang, J.; Zou, S.; Liu, L.; Guha, D.; Gabuzda, D.;  
820 Ho, D. D.; Kappes, J. C.; Sodroski, J., Dual Pathways of Human Immunodeficiency Virus  
821 Type 1 Envelope Glycoprotein Trafficking Modulate the Selective Exclusion of  
822 Uncleaved Oligomers from Virions. *J Virol* **2021**, 95, (3).
- 823 85. Anand, S. P.; Prévost, J.; Descôteaux-Dinelle, J.; Richard, J.; Nguyen, D. N.; Medjahed,  
824 H.; Chen, H.-C.; Smith, A. B.; Pazgier, M.; Finzi, A., HIV-1 Envelope Glycoprotein Cell  
825 Surface Localization Is Associated with Antibody-Induced Internalization. *Viruses* **2021**,  
826 13, (10), 1953.
- 827 86. Alsahafi, N.; Ding, S.; Richard, J.; Markle, T.; Brassard, N.; Walker, B.; Lewis, G. K.;  
828 Kaufmann, D. E.; Brockman, M. A.; Finzi, A., Nef Proteins from HIV-1 Elite Controllers  
829 Are Inefficient at Preventing Antibody-Dependent Cellular Cytotoxicity. *J Virol* **2016**, 90,  
830 (6), 2993-3002.

- 831 87. Aloia, R. C.; Tian, H.; Jensen, F. C., Lipid composition and fluidity of the human  
832 immunodeficiency virus envelope and host cell plasma membranes. *Proc Natl Acad Sci*  
833 *U S A* **1993**, 90, (11), 5181-5.
- 834 88. Vishwanathan, S. A.; Thomas, A.; Brasseur, R.; Epand, R. F.; Hunter, E.; Epand, R. M.,  
835 Large changes in the CRAC segment of gp41 of HIV do not destroy fusion activity if the  
836 segment interacts with cholesterol. *Biochemistry* **2008**, 47, (45), 11869-76.
- 837 89. Salimi, H.; Johnson, J.; Flores, M. G.; Zhang, M. S.; O'Malley, Y.; Houtman, J. C.;  
838 Schlievert, P. M.; Haim, H., The lipid membrane of HIV-1 stabilizes the viral envelope  
839 glycoproteins and modulates their sensitivity to antibody neutralization. *J Biol Chem*  
840 **2020**, 295, (2), 348-362.
- 841 90. Cummins, L. M.; Weinhold, K. J.; Matthews, T. J.; Langlois, A. J.; Perno, C. F.; Condie,  
842 R. M.; Allain, J. P., Preparation and characterization of an intravenous solution of IgG  
843 from human immunodeficiency virus-seropositive donors. *Blood* **1991**, 77, (5), 1111-7.
- 844 91. Prevost, J.; Richard, J.; Medjahed, H.; Alexander, A.; Jones, J.; Kappes, J. C.;  
845 Ochsensbauer, C.; Finzi, A., Incomplete Downregulation of CD4 Expression Affects HIV-1  
846 Env Conformation and Antibody-Dependent Cellular Cytotoxicity Responses. *J Virol*  
847 **2018**, 92, (13).
- 848 92. Alshafi, N.; Richard, J.; Prevost, J.; Coutu, M.; Brassard, N.; Parsons, M. S.; Kaufmann,  
849 D. E.; Brockman, M.; Finzi, A., Impaired downregulation of NKG2D ligands by Nef  
850 protein from elite controllers sensitizes HIV-1-infected cells to ADCC. *J Virol* **2017**.
- 851 93. Braun, E.; Hotter, D.; Koepke, L.; Zech, F.; Gross, R.; Sparrer, K. M. J.; Muller, J. A.;  
852 Pfaller, C. K.; Heusinger, E.; Wombacher, R.; Sutter, K.; Dittmer, U.; Winkler, M.;  
853 Simmons, G.; Jakobsen, M. R.; Conzelmann, K. K.; Pohlmann, S.; Munch, J.; Fackler,  
854 O. T.; Kirchhoff, F.; Sauter, D., Guanylate-Binding Proteins 2 and 5 Exert Broad Antiviral  
855 Activity by Inhibiting Furin-Mediated Processing of Viral Envelope Proteins. *Cell Rep*  
856 **2019**, 27, (7), 2092-2104 e10.
- 857 94. Lodermeier, V.; Suhr, K.; Schrott, N.; Kolbe, C.; Sturzel, C. M.; Krnavek, D.; Munch, J.;  
858 Dietz, C.; Waldmann, T.; Kirchhoff, F.; Goffinet, C., 90K, an interferon-stimulated gene  
859 product, reduces the infectivity of HIV-1. *Retrovirology* **2013**, 10, 111.
- 860 95. Tada, T.; Zhang, Y.; Koyama, T.; Tobiume, M.; Tsunetsugu-Yokota, Y.; Yamaoka, S.;  
861 Fujita, H.; Tokunaga, K., MARCH8 inhibits HIV-1 infection by reducing virion  
862 incorporation of envelope glycoproteins. *Nat Med* **2015**, 21, (12), 1502-7.
- 863 96. Yu, J.; Li, M.; Wilkins, J.; Ding, S.; Swartz, T. H.; Esposito, A. M.; Zheng, Y. M.; Freed,  
864 E. O.; Liang, C.; Chen, B. K.; Liu, S. L., IFITM Proteins Restrict HIV-1 Infection by  
865 Antagonizing the Envelope Glycoprotein. *Cell Rep* **2015**, 13, (1), 145-156.
- 866 97. Wang, Y.; Pan, Q.; Ding, S.; Wang, Z.; Yu, J.; Finzi, A.; Liu, S. L.; Liang, C., The V3  
867 Loop of HIV-1 Env Determines Viral Susceptibility to IFITM3 Impairment of Viral  
868 Infectivity. *J Virol* **2017**, 91, (7).
- 869 98. Foster, T. L.; Wilson, H.; Iyer, S. S.; Coss, K.; Doores, K.; Smith, S.; Kellam, P.; Finzi, A.;  
870 Borrow, P.; Hahn, B. H.; Neil, S. J. D., Resistance of Transmitted Founder HIV-1 to  
871 IFITM-Mediated Restriction. *Cell Host Microbe* **2016**, 20, (4), 429-442.
- 872 99. Drouin, A.; Migraine, J.; Durand, M. A.; Moreau, A.; Burlaud-Gaillard, J.; Beretta, M.;  
873 Roingeard, P.; Bouvin-Pley, M.; Braibant, M., Escape of HIV-1 envelope glycoprotein  
874 from the restriction of infection by IFITM3. *J Virol* **2020**.
- 875 100. Krapp, C.; Hotter, D.; Gawanbacht, A.; McLaren, P. J.; Kluge, S. F.; Sturzel, C. M.;  
876 Mack, K.; Reith, E.; Engelhart, S.; Ciuffi, A.; Hornung, V.; Sauter, D.; Telenti, A.;  
877 Kirchhoff, F., Guanylate Binding Protein (GBP) 5 Is an Interferon-Inducible Inhibitor of  
878 HIV-1 Infectivity. *Cell Host Microbe* **2016**, 19, (4), 504-14.
- 879 101. Jean, F.; Stella, K.; Thomas, L.; Liu, G.; Xiang, Y.; Reason, A. J.; Thomas, G., alpha1-  
880 Antitrypsin Portland, a bioengineered serpin highly selective for furin: application as an  
881 antipathogenic agent. *Proc Natl Acad Sci U S A* **1998**, 95, (13), 7293-8.

- 882 102. Khatib, A. M.; Siegfried, G.; Prat, A.; Luis, J.; Chretien, M.; Metrakos, P.; Seidah, N. G.,  
883 Inhibition of proprotein convertases is associated with loss of growth and tumorigenicity  
884 of HT-29 human colon carcinoma cells: importance of insulin-like growth factor-1 (IGF-1)  
885 receptor processing in IGF-1-mediated functions. *J Biol Chem* **2001**, 276, (33), 30686-  
886 93.
- 887 103. Bassi, D. E.; Lopez De Cicco, R.; Mahloogi, H.; Zucker, S.; Thomas, G.; Klein-Szanto, A.  
888 J., Furin inhibition results in absent or decreased invasiveness and tumorigenicity of  
889 human cancer cells. *Proc Natl Acad Sci U S A* **2001**, 98, (18), 10326-31.
- 890 104. Kibler, K. V.; Miyazato, A.; Yedavalli, V. S.; Dayton, A. I.; Jacobs, B. L.; Dapolito, G.;  
891 Kim, S. J.; Jeang, K. T., Polyarginine inhibits gp160 processing by furin and suppresses  
892 productive human immunodeficiency virus type 1 infection. *J Biol Chem* **2004**, 279, (47),  
893 49055-63.
- 894 105. Remacle, A. G.; Gawlik, K.; Golubkov, V. S.; Cadwell, G. W.; Liddington, R. C.; Cieplak,  
895 P.; Millis, S. Z.; Desjardins, R.; Routhier, S.; Yuan, X. W.; Neugebauer, W. A.; Day, R.;  
896 Strongin, A. Y., Selective and potent furin inhibitors protect cells from anthrax without  
897 significant toxicity. *Int J Biochem Cell Biol* **2010**, 42, (6), 987-95.
- 898 106. Klenk, H. D.; Rott, R., The molecular biology of influenza virus pathogenicity. *Adv Virus*  
899 *Res* **1988**, 34, 247-81.
- 900 107. Volchkov, V. E.; Feldmann, H.; Volchkova, V. A.; Klenk, H. D., Processing of the Ebola  
901 virus glycoprotein by the proprotein convertase furin. *Proc Natl Acad Sci U S A* **1998**, 95,  
902 (10), 5762-7.
- 903 108. Rawling, J.; Cano, O.; Garcin, D.; Kolakofsky, D.; Melero, J. A., Recombinant Sendai  
904 viruses expressing fusion proteins with two furin cleavage sites mimic the syncytial and  
905 receptor-independent infection properties of respiratory syncytial virus. *J Virol* **2011**, 85,  
906 (6), 2771-80.
- 907 109. Johnson, B. A.; Xie, X.; Bailey, A. L.; Kalveram, B.; Lokugamage, K. G.; Muruato, A.;  
908 Zou, J.; Zhang, X.; Juelich, T.; Smith, J. K.; Zhang, L.; Bopp, N.; Schindewolf, C.; Vu, M.;  
909 Vanderheiden, A.; Winkler, E. S.; Swetnam, D.; Plante, J. A.; Aguilar, P.; Plante, K. S.;  
910 Popov, V.; Lee, B.; Weaver, S. C.; Suthar, M. S.; Routh, A. L.; Ren, P.; Ku, Z.; An, Z.;  
911 Debbink, K.; Diamond, M. S.; Shi, P. Y.; Freiberg, A. N.; Menachery, V. D., Loss of furin  
912 cleavage site attenuates SARS-CoV-2 pathogenesis. *Nature* **2021**, 591, (7849), 293-  
913 299.
- 914 110. Sasaki, M.; Toba, S.; Itakura, Y.; Chambaro, H. M.; Kishimoto, M.; Tabata, K.; Intaruck,  
915 K.; Uemura, K.; Sanaki, T.; Sato, A.; Hall, W. W.; Orba, Y.; Sawa, H., SARS-CoV-2  
916 Bearing a Mutation at the S1/S2 Cleavage Site Exhibits Attenuated Virulence and  
917 Confers Protective Immunity. *mBio* **2021**, 12, (4), e0141521.

918

# ADCC response

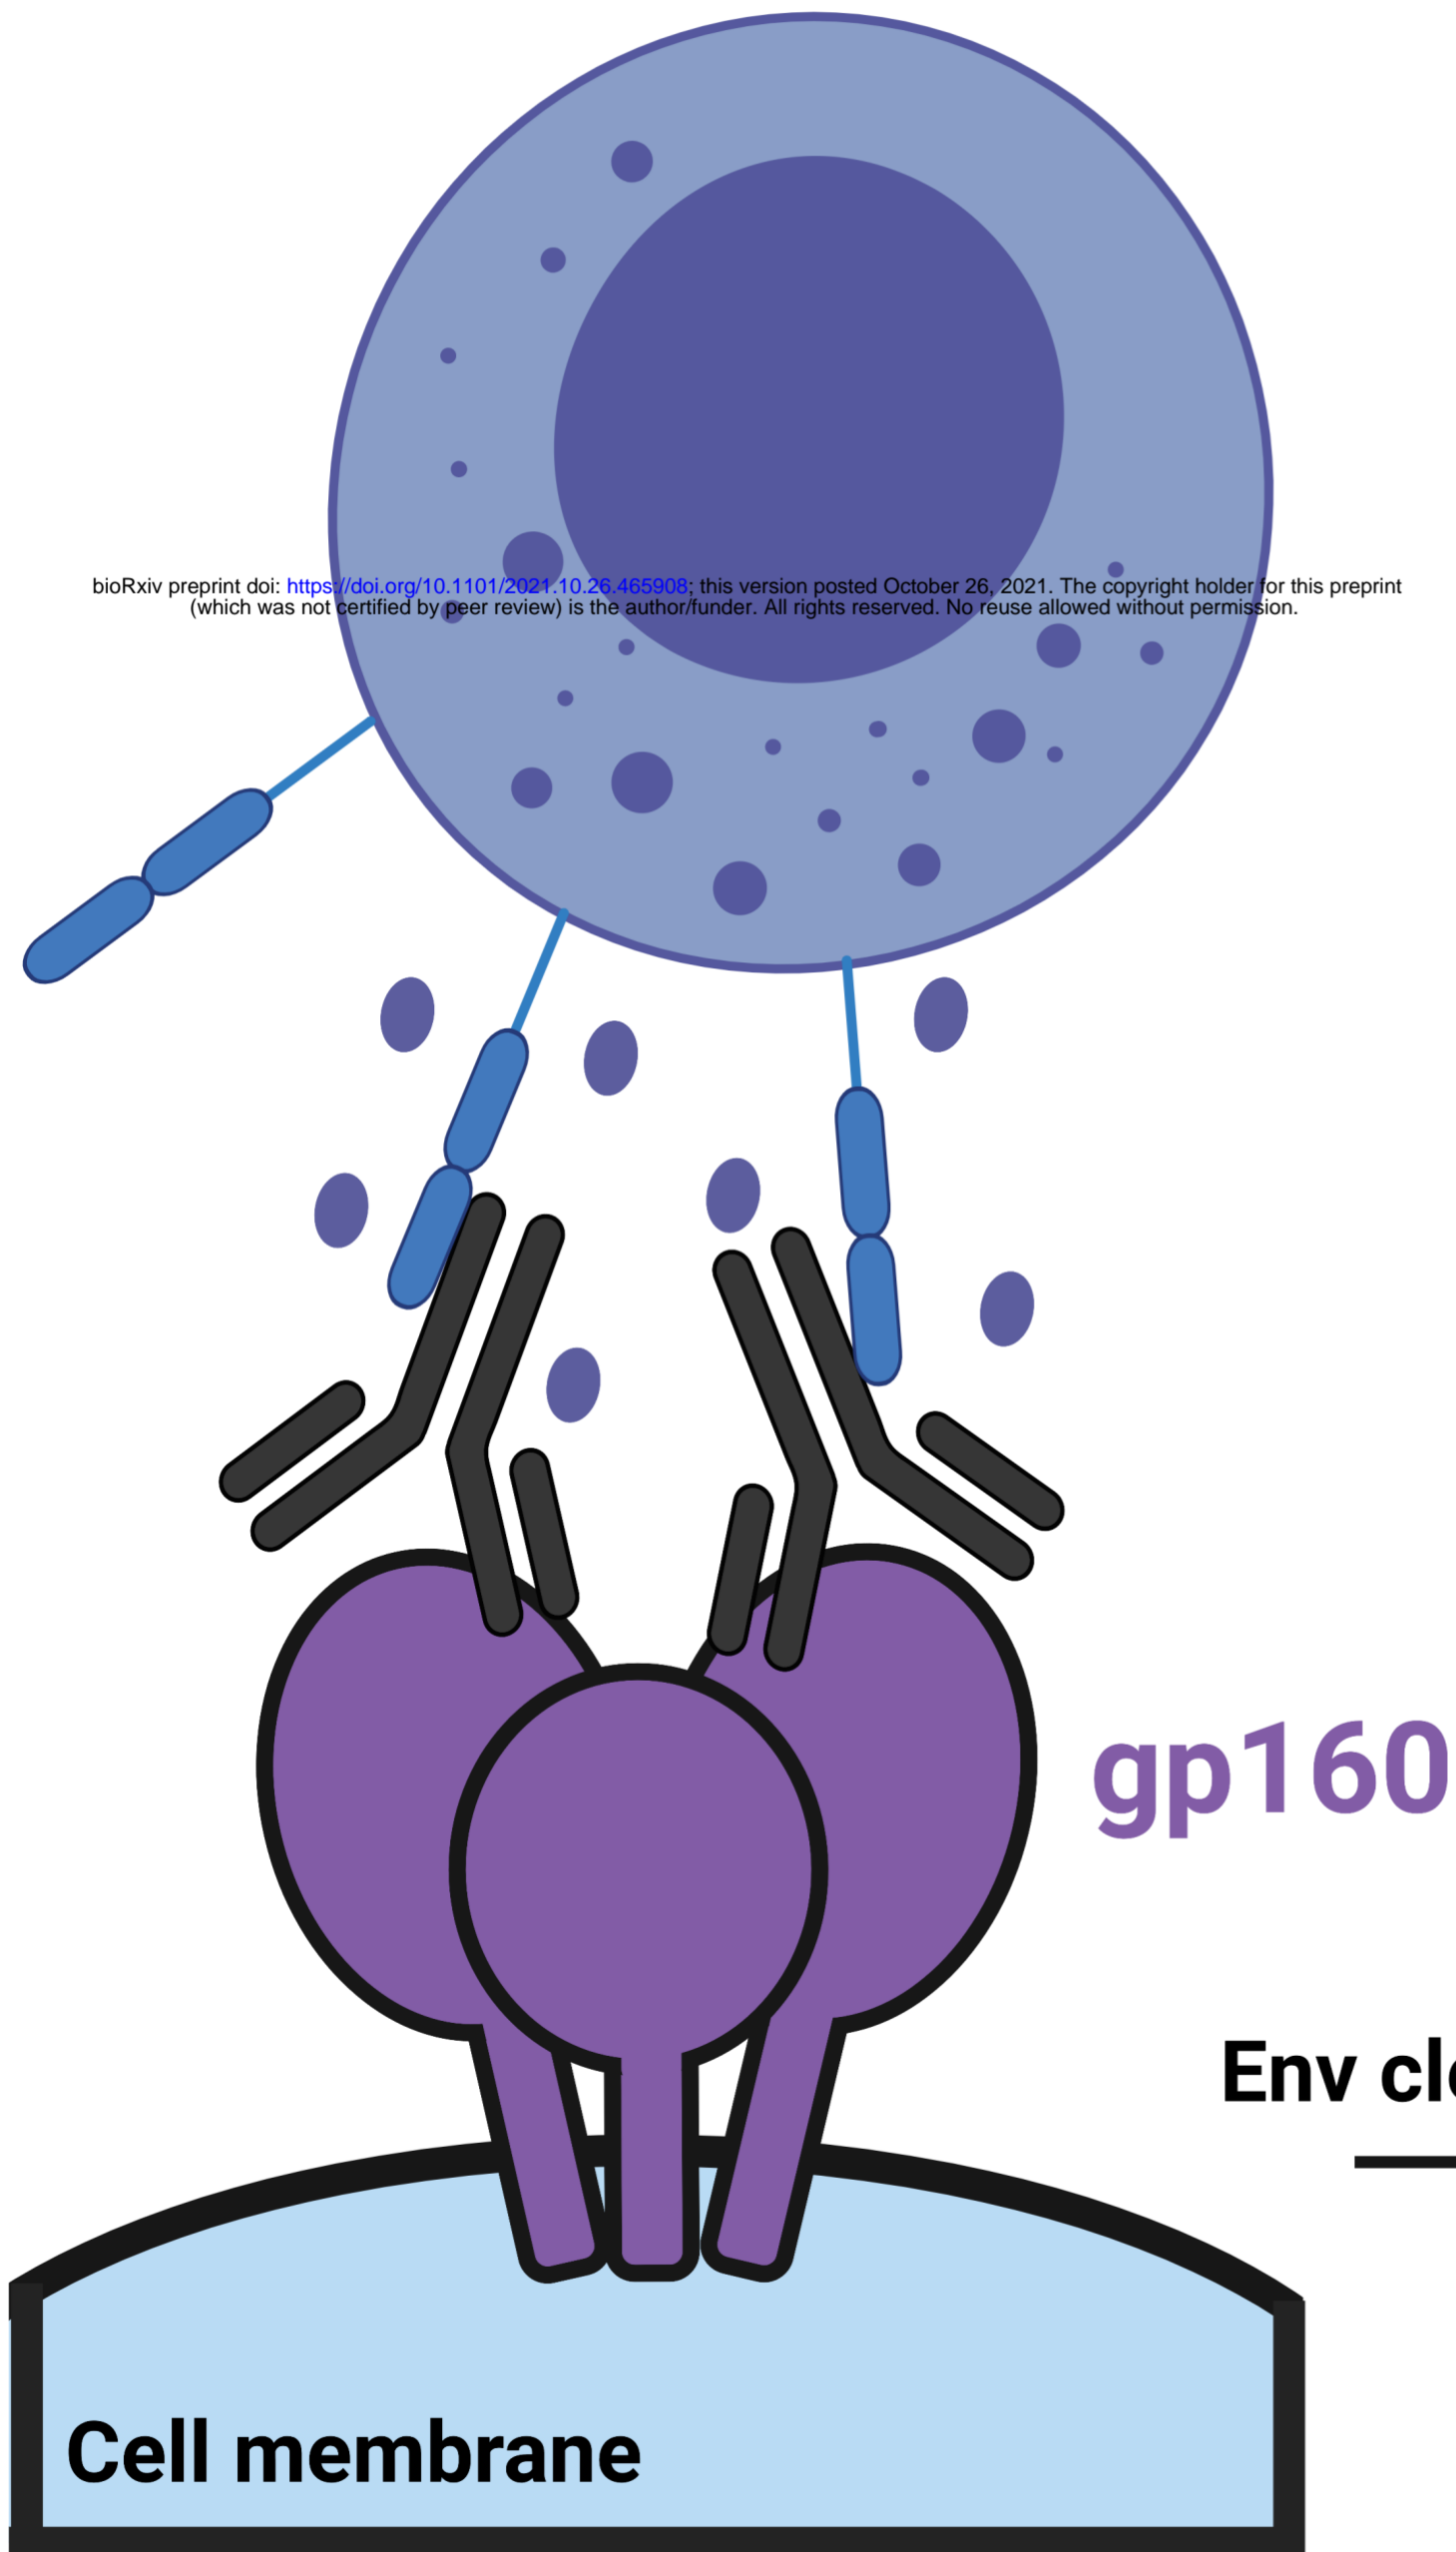

# Protection from ADCC

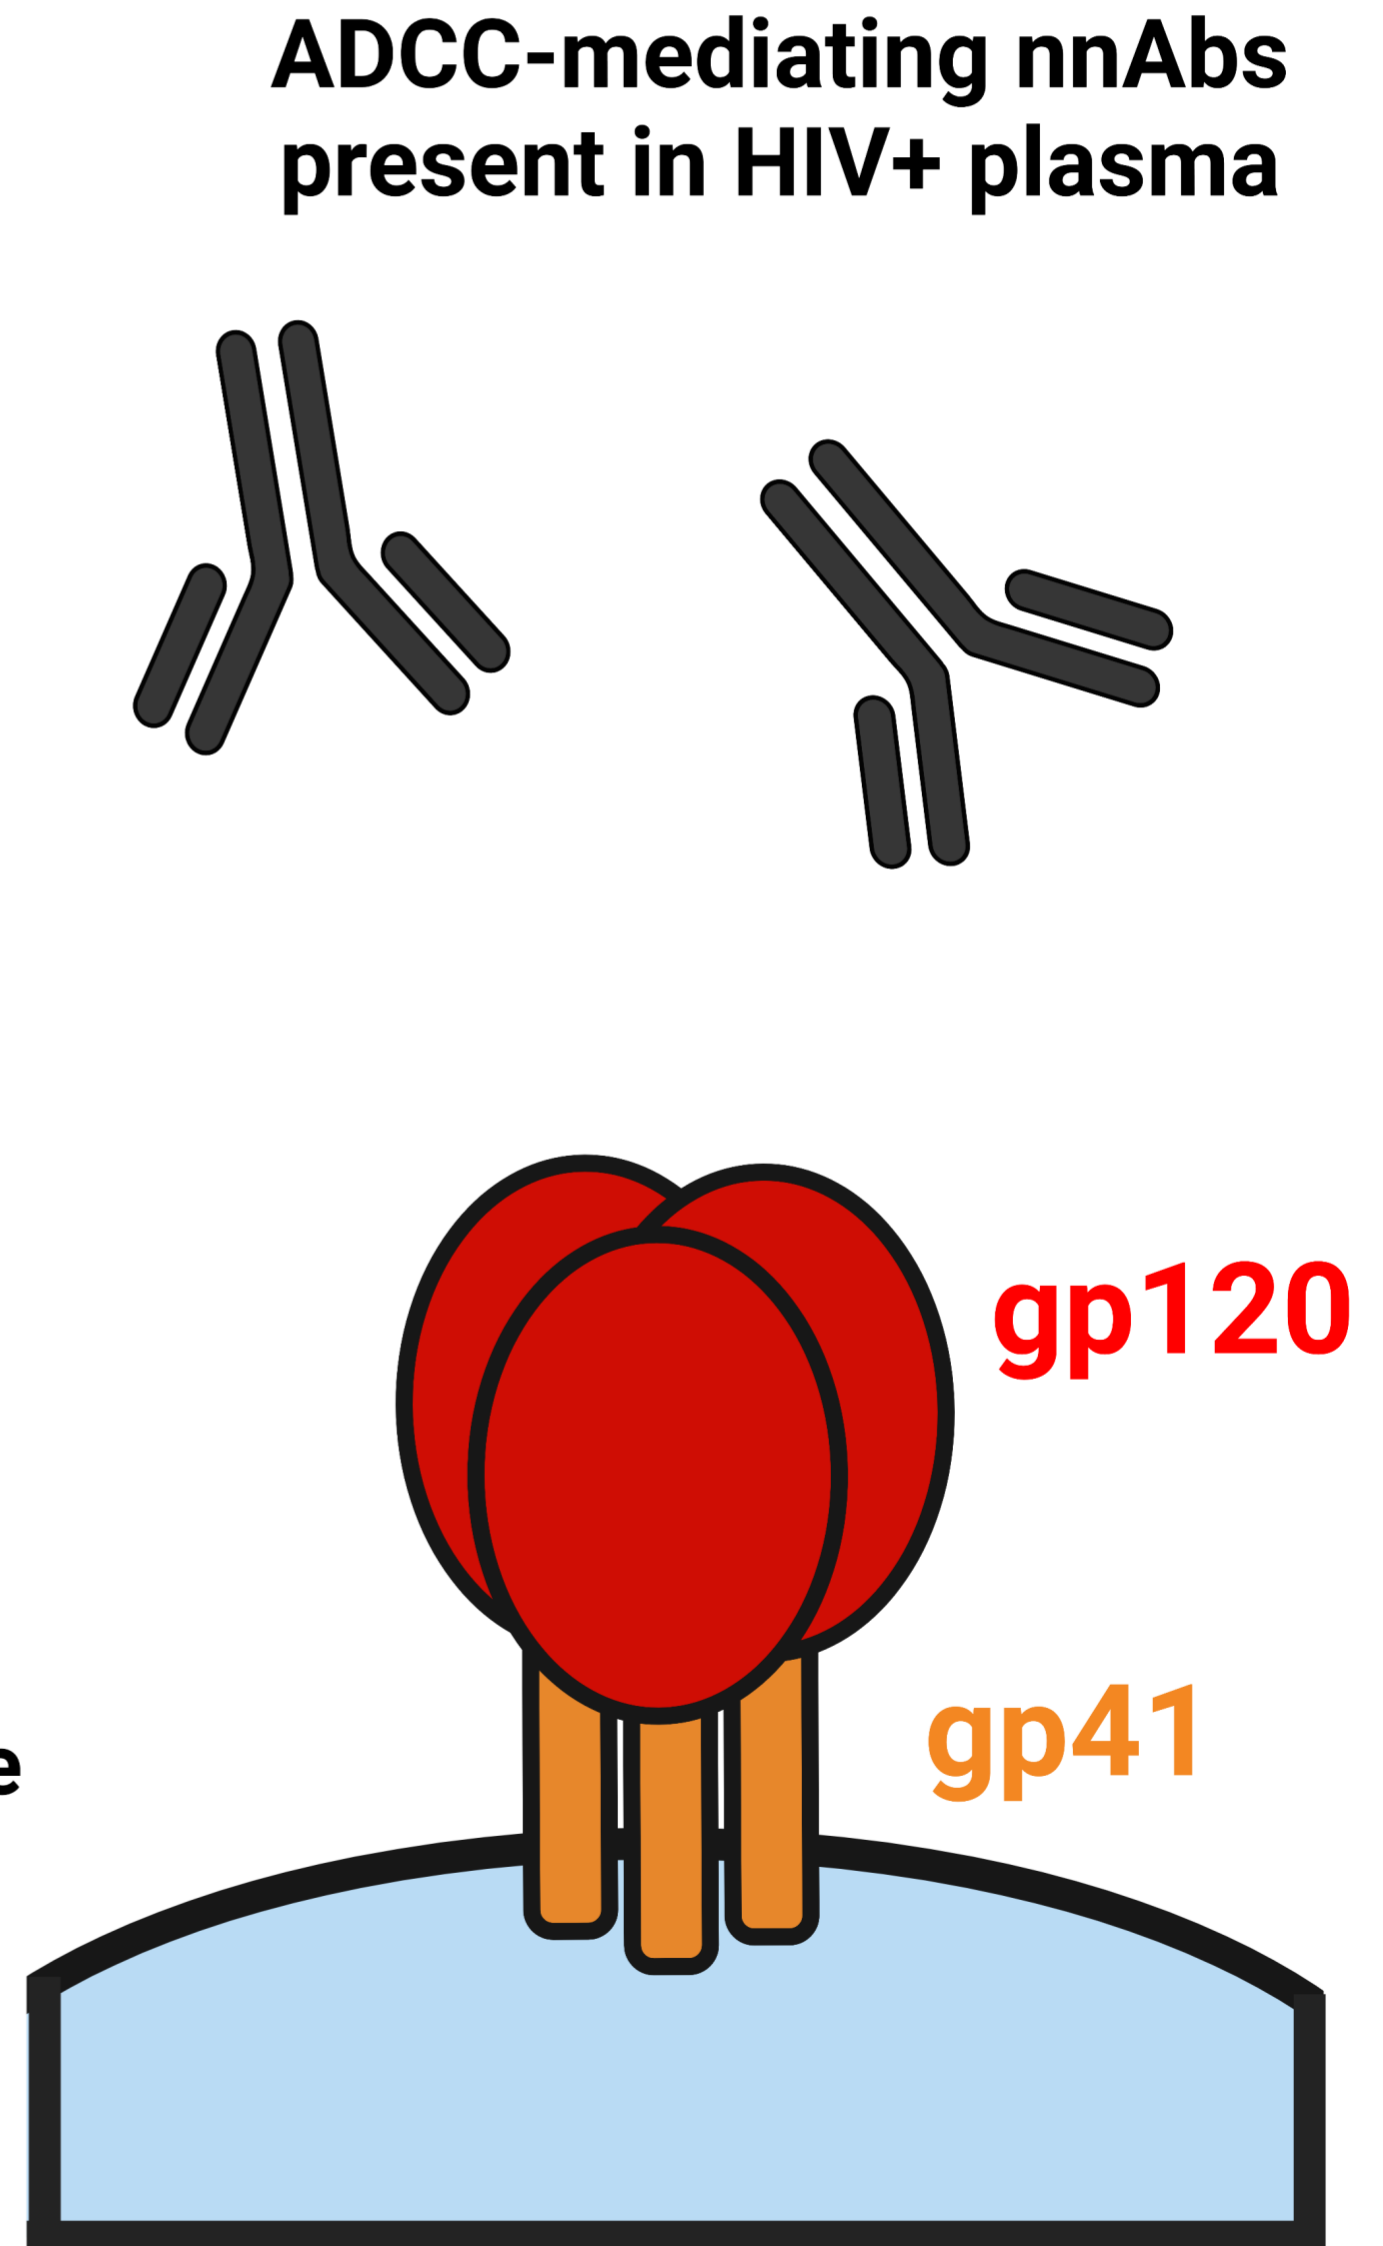

Source: https://www.biorxiv.org/content/biorxiv/early/2021/10/26/2021.10.26.465908.full.pdf
